# Dynein dysfunction prevents maintenance of high concentrations of slow axonal transport cargos at the axon terminal

Ivan A. Kuznetsov<sup>(a), (b)</sup> and Andrey V. Kuznetsov<sup>(c)</sup>

<sup>(a)</sup>Perelman School of Medicine, University of Pennsylvania, Philadelphia, PA 19104, USA

<sup>(b)</sup>Department of Bioengineering, University of Pennsylvania, Philadelphia, PA 19104, USA

<sup>(c)</sup>Dept. of Mechanical and Aerospace Engineering, North Carolina State University,

Raleigh, NC 27695-7910, USA; e-mail: avkuznet@ncsu.edu

## Abstract

We use two different models to simulate bidirectional transport in an axon: an anterograde-retrograde model and a full slow transport model. Our goal is to investigate what the models would predict if the retrograde motor becomes dysfunctional. We are motivated by reports that mutations in dynein-encoding genes can cause diseases associated with peripheral motor and sensory neurons, such as type 2O of Charcot-Marie-Tooth disease. We attempt to understand why this happens. Indeed, dynein is a retrograde motor, and its mutations should not directly influence anterograde transport toward the axon terminal. Our modeling results unexpectedly predict that slow axonal transport fails to transport cargos against their concentration gradient if the dynein motor fails. The reason is the inability of the kinesin-only transport model to know what cargo concentration must be maintained at the axon tip because of the absence of a retrograde motor. Perturbation analysis for the case when the retrograde motor velocity becomes close to zero predicts uniform cargo distributions along the axon. A neuron may attempt to increase the cargo concentration in the terminal by increasing the somatic cargo concentration. This may lead to other problems, such as the formation of Lewy bodies in the case of  $\alpha$ -synuclein. Our result is limited to small cargo diffusivity, which is a reasonable assumption for many slow axonal transport cargos (such as cytosolic and cytoskeletal proteins, neurofilaments, actin, and microtubules) which are transported as large multiprotein complexes or polymers.

**Keywords** neuron; axon; mathematical modeling; slow and fast axonal transport; molecular motors; alpha-synuclein

# 1. Introduction

To transport large protein molecules and vesicles at large distances, neurons utilize a complicated “railway” system, which consists of microtubule (MT) tracks and molecular motors that pull various cargos along these tracks. Motors that pull cargos in the anterograde direction belong to the kinesin family while retrograde transport is provided by cytoplasmic dynein [1].

Motor protein dysfunction plays a role in many neurodegenerative diseases [2-4]. Dynein mutations are associated with many cases of malformations of cortical development, spinal muscular atrophy with lower extremity dominance, and congenital muscular dystrophy. Another example is Charcot-Marie-Tooth (CMT) disease that affects peripheral motor and sensory neurons [5]. CMT type 2O disease is caused by a mutation in gene *DYNC1H1* that encodes the dynein heavy chain [5-8]. The involvement of molecular motors in CMT is not surprising because long sensory and motor neurons require a large anterograde flux of various cargos from the soma to support their remote terminals [9]. However, an intriguing question is why dying back degeneration of these neurons can be associated not only with kinesin, but also with dynein dysfunction? Possible explanation why neurons can be negatively affected by dynein dysfunction is the inability of the axon to deliver dysfunctional organelles and proteins to the soma for degradation or failure of retrograde signaling [10].

In this paper, we consider another possible reason, associated with our hypothesis that dynein-driven transport is needed to enable cargo transport against its concentration gradient. This is because when cargo diffusivity is small, a continuum model of anterograde transport is described by a first-order differential equation, which allows for the imposition of a boundary condition only at the axon hillock. The equation does not allow for the imposition of the second boundary condition (prescribing a higher cargo concentration) at the axon tip. To simulate an increased cargo concentration at the axon tip, both anterograde and retrograde components are needed [11]. Ref. [11] used this argument to explain the presence of a retrograde component in slow axonal transport.

In this paper, we attempt to answer the question of how dynein-driven transport can affect the transport of cargos toward the axon terminal. We will concentrate on slow axonal transport-b (SCb), which the axon uses, for example, to transport approximately 200 cytosolic proteins from the soma to the presynaptic terminal [12]. The average velocity of SCb transport is in the range 2-8 mm/day (0.023-0.093  $\mu\text{m/s}$ ). The slow average velocity of SCb (much less than 1  $\mu\text{m/s}$ , the average velocity of kinesin and dynein motors) is because most of the time slow axonal transport cargos spend pausing, and only a small percentage of time they move rapidly. Another intriguing feature of slow axonal transport is that, during the rapid phase of their motion, cargos move bidirectionally, propelled by kinesin or dynein motors, with a bias toward

anterograde motion, so on average they move toward the axon tip [13,14]. An intriguing question raised in ref. [10] as well as by many other researchers is: why in slow axonal transport do the same cargos move bidirectionally if they simply need to be transported to the axon tip? Our explanation is that otherwise, axons will not be able to move cargo against its increasing concentration, which corresponds to the situation when the cargo concentration is small at the soma and high at the presynaptic terminal. This finding reported in ref. [11] holds for the case when cargos are transported as polymers or large multiprotein complexes that have small diffusivity, which is the case for many SCa and SCb proteins.

In this paper we concentrate on one particular slow axonal transport cargo,  $\alpha$ -synuclein ( $\alpha$ -syn) [15-18]. Since in a healthy neuron  $\alpha$ -syn predominantly exists in the monomeric form [19], hereafter for brevity for  $\alpha$ -syn monomer we will write  $\alpha$ -syn.  $\alpha$ -syn is mostly known for its involvement in Parkinson's disease [20,21].

We simulated dynein dysfunction by a decrease of dynein velocity. Our model is a cargo-level model. It simulates the behavior of cargos rather than the behavior of motors. For example, a single cargo can be driven by several motors. Therefore, by specifying dynein velocity we specify the velocity of retrograde cargos during the fast phase of their movement on MTs. Cargos can also pause when the motors that drive them temporarily disengage from MTs.

Our goal is to simulate how dynein dysfunction can affect slow axonal transport of  $\alpha$ -syn. Although we perform computations using parameter values for  $\alpha$ -syn, the obtained trends are expected to be valid for other proteins transported by slow axonal transport.

## 2. Methods and models

### 2.1. A simplified case: axonal transport model that includes anterograde and retrograde motor-driven transport without diffusion and pausing

#### 2.1.1. General formulation of the anterograde-retrograde cargo transport model

A schematic representation of an axon is shown in Fig. 1. We start with a simplified model of bidirectional transport suggested in ref. [11]. Since long-distance transport of  $\alpha$ -syn is propelled by kinesin and dynein motors [22], the simplified model includes only two kinetic states, which simulate anterograde (driven by kinesin) and retrograde (driven by dynein) cargos (Fig. 2a).

For simulating long-range cargo transport in an axon, we used a quasi-steady-state approximation and neglected the time derivatives in the model equations. We also simulated axonal transport as one-

dimensional and characterized cargo concentrations in all kinetic states by their linear number densities. We defined  $\alpha$ -syn concentrations in various kinetic states in Table S1. Model parameters are defined in Tables S2 and S3. Table S3 defines kinetic constants,  $\gamma^*$ s, used in the model to characterize  $\alpha$ -syn transitions between different kinetic states, see Fig. 2a. Stating the conservation of  $\alpha$ -syn in the anterograde state, characterized by concentration  $n_a^*$  (Fig. 2a), we obtained the following equation:

$$-v_a^* \frac{dn_a^*}{dx^*} - \gamma_{ar}^* n_a^* + \gamma_{ra}^* n_r^* = 0, \quad (1)$$

where  $x^*$  is the Cartesian coordinate that protrudes from the axon hillock ( $x^* = 0$ ) to the axon tip ( $x^* = L^*$ ), Fig. 1;  $v_a^*$  is the velocity of rapid motions of  $\alpha$ -syn on MTs propelled by kinesin motors in slow axonal transport, and  $\gamma_{ar}^*$  and  $\gamma_{ra}^*$  are kinetic constants defined in Fig. 2a. The first term on the left-hand side of Eq. (1) characterizes a change of the number of  $\alpha$ -syn molecules in the control volume (CV) due to anterograde transport of  $\alpha$ -syn, the second term characterizes a decrease of the number of  $\alpha$ -syn molecules due to their transition to the retrograde state, and the third term characterizes an increase of the number of  $\alpha$ -syn molecules due to their transition to the anterograde state (Fig. 2a).

Stating the conservation of  $\alpha$ -syn in the retrograde state, characterized by concentration  $n_r^*$  (Fig. 2a), we obtained the following equation:

$$v_r^* \frac{dn_r^*}{dx^*} - \gamma_{ra}^* n_r^* + \gamma_{ar}^* n_a^* = 0, \quad (2)$$

where  $v_r^*$  is the velocity of rapid motions of  $\alpha$ -syn on MTs propelled by dynein motors in slow axonal transport. The first term on the left-hand side of Eq. (2) characterizes the effect of retrograde transport of  $\alpha$ -syn due to the action of dynein motors while the second and third terms on the left-hand side are the kinetic terms characterizing the effects of  $\alpha$ -syn transitions to the anterograde and retrograde kinetic states, respectively.

Eqs. (1) and (2) must be solved subject to the following boundary conditions. We assumed that  $\alpha$ -syn is synthesized in the soma at a constant rate. Since all of the synthesized  $\alpha$ -syn must enter the axon, this results in the following boundary condition at the axon hillock:

$$\text{At } x^* = 0: \quad j_{tot}^*(x^*) = j_{tot,x=0}^*, \quad (3)$$

where  $j_{tot,x=0}^*$  is the flux of  $\alpha$ -syn at the axon hillock.

A given (high) concentration of  $\alpha$ -syn,  $n_{tot,x=L}^*$ , is imposed at the axon tip:

$$\text{At } x^* = L : \quad n_{tot}^* = n_{tot,x=L}^* . \quad (4)$$

For the model displayed in Fig. 2a the total flux of cargo,  $j_{tot}^*$ , can be calculated as the difference between the anterograde and retrograde motor-driven fluxes:

$$j_{tot}^*(x^*) = v_a^* n_a^* - v_r^* n_r^* . \quad (5)$$

The total cargo concentration,  $n_{tot}^*$ , is found as the sum of cargo concentrations in the anterograde and retrograde kinetic states:

$$n_{tot}^* = n_a^* + n_r^* . \quad (6)$$

### 2.1.2. A perturbation solution of the anterograde-retrograde cargo transport model for the case of small dynein velocity

We are interested in investigating the question of whether the model can simulate cargo transport against the cargo's concentration gradient if dynein velocity is small. For this reason, we assumed that  $v_r^*$  is a small parameter. The following perturbation expansions were utilized:

$$n_a^* = n_{a,0}^* + v_r^* n_{a,1}^* + \dots , \quad (7)$$

$$n_r^* = n_{r,0}^* + v_r^* n_{r,1}^* + \dots . \quad (8)$$

The substitution of Eqs. (7) and (8) into Eqs. (1) and (2) results in

$$-v_a^* \frac{dn_{a,0}^*}{dx^*} - v_r^* v_a^* \frac{dn_{a,1}^*}{dx^*} - \gamma_{ar}^* n_{a,0}^* - v_r^* \gamma_{ar}^* n_{a,1}^* + \gamma_{ra}^* n_{r,0}^* + v_r^* \gamma_{ra}^* n_{r,1}^* = 0 , \quad (9)$$

$$v_r^* \frac{dn_{r,0}^*}{dx^*} + (v_r^*)^2 \frac{dn_{r,1}^*}{dx^*} - \gamma_{ra}^* n_{r,0}^* - v_r^* \gamma_{ra}^* n_{r,1}^* + \gamma_{ar}^* n_{a,0}^* + v_r^* \gamma_{ar}^* n_{a,1}^* = 0 . \quad (10)$$

By separating the terms that do and do not contain the small parameter  $v_r^*$  in Eqs. (9) and (10), and equating the terms that do not contain  $v_r^*$  to zero, the following is obtained:

$$-v_a^* \frac{dn_{a,0}^*}{dx^*} - \gamma_{ar}^* n_{a,0}^* + \gamma_{ra}^* n_{r,0}^* = 0 , \quad (11)$$

$$-\gamma_{ra}^* n_{r,0}^* + \gamma_{ar}^* n_{a,0}^* = 0. \quad (12)$$

Solving Eq. (12) for  $n_{r,0}^*$ , we obtained:

$$n_{r,0}^* = \frac{\gamma_{ar}^*}{\gamma_{ra}^*} n_{a,0}^*. \quad (13)$$

Eliminating  $n_{r,0}^*$  from Eq. (11), the following was obtained:

$$-v_a^* \frac{dn_{a,0}^*}{dx^*} = 0. \quad (14)$$

The solution of Eq. (14) is

$$n_{a,0}^* = C, \quad (15)$$

where  $C$  is the integration constant.

Substituting Eq. (15) into Eq. (13), we obtained that

$$n_{r,0}^* = \frac{\gamma_{ar}^*}{\gamma_{ra}^*} C. \quad (16)$$

The utilization of Eqs. (15) and (16) gives the following equation for the total cargo concentration:

$$n_{tot,0}^* = n_{a,0}^* + n_{r,0}^* = \left(1 + \frac{\gamma_{ar}^*}{\gamma_{ra}^*}\right) C. \quad (17)$$

Using Eq. (3) and solving Eq. (17) for  $C$ , the following was obtained:

$$C = j_{tot,x=0}^* / v_a^*. \quad (18)$$

Substituting Eq. (18) into Eq. (15) gives that

$$n_{a,0}^* = j_{tot,x=0}^* / v_a^*. \quad (19)$$

Substituting Eq. (18) into Eq. (16) results in the following:

$$n_{r,0}^* = \frac{\gamma_{ar}^*}{\gamma_{ra}^*} \frac{j_{tot,x=0}^*}{v_a^*}. \quad (20)$$

Finally, substituting Eq. (18) into Eq. (17) gives the following equation for the total cargo concentration:

$$n_{tot,0}^* = \left(1 + \frac{\gamma_{ar}^*}{\gamma_{ra}^*}\right) \frac{j_{tot,x=0}^*}{v_a^*}. \quad (21)$$

Eq. (21) shows that dynein dysfunction prevents the maintenance of a higher concentration of  $\alpha$ -syn at the axon tip than at the soma. In principle, a neuron can increase the somatic concentration of cargo in an attempt to compensate for dynein dysfunction. This may lead to various problems in the soma, such as Lewy body formation.

## 2.2. Full slow axonal transport model

### 2.2.1. General formulation of the full slow axonal transport model

We now move on to the full slow axonal transport model, a kinetic diagram for which is displayed in Fig. 2b. The continuum slow axonal transport model simulating neurofilament transport was developed in [23]. The model was extended in [24,25] to simulate slow axonal transport of cytosolic proteins, by adding a kinetic state for proteins that freely diffuse in the cytosol as well as a degradation term in the equation for the free (freely moving in the cytosol) proteins describing protein destruction in proteasomes.

Conservation of  $\alpha$ -syn driven anterogradely by kinesin motors is stated by the following equation:

$$-v_a^* \frac{dn_a^*}{dx} - \gamma_{10}^* n_a^* + \gamma_{01}^* n_{a0}^* = 0. \quad (22)$$

Eq. (22) is similar to Eq. (1), but kinetic constants are different and are now defined in Fig. 2b. The first term on the left-hand side describes the effect of kinesin-driven transport of  $\alpha$ -syn while the second and third terms describe transitions between various kinetic states.

Conservation of  $\alpha$ -syn driven retrogradely by dynein motors is stated by the following equation:

$$v_r^* \frac{dn_r^*}{dx} - \gamma_{10}^* n_r^* + \gamma_{01}^* n_{r0}^* = 0, \quad (23)$$

where the first term describes the effect of dynein-driven transport and the second and third terms are kinetic terms describing  $\alpha$ -syn transitions between kinetic states. This equation is identical to Eq. (2), but kinetic constants are different.

Since in slow axonal transport most of the time cargos spend pausing [10], the full model also includes equations stating  $\alpha$ -syn conservation in the pausing states. It is assumed that despite pausing  $\alpha$ -syn retains its association with the motors and is ready to resume its motion in the anterograde or retrograde direction

when the motors reconnect to MTs. The corresponding  $\alpha$ -syn concentrations in the pausing states are  $n_{a0}^*$  and  $n_{r0}^*$ , respectively (Fig. 2b):

$$-(\gamma_{01}^* + \gamma_{ar}^* + \gamma_{off,a}^*)n_{a0}^* + \gamma_{10}^*n_a^* + \gamma_{ra}^*n_{r0}^* + \gamma_{on,a}^*n_{free}^* = 0, \quad (24)$$

$$-(\gamma_{01}^* + \gamma_{ra}^* + \gamma_{off,r}^*)n_{r0}^* + \gamma_{10}^*n_r^* + \gamma_{ar}^*n_{a0}^* + \gamma_{on,r}^*n_{free}^* = 0. \quad (25)$$

Because in the pausing states  $\alpha$ -syn does not move, Eqs. (24) and (25) include only kinetic terms, which describe transitions between different kinetic states (Fig. 2b).

Stating conservation of  $\alpha$ -syn in the free (cytosolic) state gives the following equation:

$$D_{n_{free}}^* \frac{d^2 n_{free}^*}{dx^{*2}} + \gamma_{off,a}^* n_{a0}^* + \gamma_{off,r}^* n_{r0}^* - (\gamma_{on,a}^* + \gamma_{on,r}^*) n_{free}^* - \frac{n_{free}^* \ln(2)}{T_{1/2,free}^*} = 0, \quad (26)$$

where  $n_{free}^*$  is the concentration of  $\alpha$ -syn in the free (cytosolic) state,  $D_{n_{free}}^*$  is the diffusivity of free  $\alpha$ -syn, and  $T_{1/2,free}^*$  is the half-life of free  $\alpha$ -syn. The first term on the left-hand side of Eq. (26) accounts for  $\alpha$ -syn diffusion when  $\alpha$ -syn is not connected to MTs. The presence of a diffusible fraction is typical for cytosolic proteins transported in SCb [26]. The last term on the left-hand side of Eq. (26) simulates  $\alpha$ -syn destruction in proteasomes [27].

Note that in Eqs. (22)-(26) the degradation term is present only in the free state. Indeed, in order to enter a proteasome,  $\alpha$ -syn must be detached from MTs. Thus, proteins moving on MTs are not subject to degradation in proteasomes, only those free-floating in the cytosol are. This has to be the case because in long neurons the time that it takes for a protein to travel from the soma to the axon tip exceeds the lifetime of free proteins. Therefore, it is likely that proteins, during their transit in axons, are protected from degradation [28,29]. If proteins can be destroyed only in the free state, this would explain how this protection is accomplished. Another possibility is that since cytosolic proteins are transported in SCb in the form of large cargo structures (multicargo complexes), it is possible that they are too large to enter proteasomes and cannot be degraded at all during transport. In this case, half-life of  $\alpha$ -syn in the free state should be close to infinity.

If  $\alpha$ -syn diffusivity  $D_{n_{free}}^*$  in Eq. (26) is not zero, Eqs. (22)-(26) must be solved subject to four boundary conditions. At the axon hillock, we imposed the total concentration of  $\alpha$ -syn at the hillock,  $n_{tot,x=0}^*$ , and



the flux of  $\alpha$ -syn entering the axon, which equals to  $n_{tot,x=0}^*$  times the average velocity of  $\alpha$ -syn (which includes pauses),  $v_{av,estimate}^*$ .

At  $x^* = 0$ :

$$n_{tot}^* = n_{tot,x=0}^*, \quad j_{tot}^* = v_{av,estimate}^* n_{tot,x=0}^*. \quad (27a,b)$$

The total flux of  $\alpha$ -syn in the full slow axonal transport model equals to the sum of diffusion-driven  $\alpha$ -syn flux, the kinesin-driven anterograde flux, and the dynein-driven retrograde flux, respectively:

$$j_{tot}^*(x^*) = -D_{n_{free}}^* \frac{dn_{free}^*}{dx^*} + v_a^* n_a^* - v_r^* n_r^*. \quad (28)$$

The total concentration of  $\alpha$ -syn now equals the sum of  $\alpha$ -syn concentrations in all five kinetic states displayed in Fig. 2b:

$$n_{tot}^* = n_a^* + n_r^* + n_{a0}^* + n_{r0}^* + n_{free}^*. \quad (29)$$

The average velocity of  $\alpha$ -syn (a parameter that depends on  $x^*$ , see ref. [30]) can then be calculated as:

$$v_{av}^*(x^*) = \frac{j_{tot}^*}{n_{tot}^*}. \quad (30)$$

At the axon tip, we imposed a zero gradient of the free  $\alpha$ -syn concentration (which is equivalent to a zero  $\alpha$ -syn diffusion flux) and a given total  $\alpha$ -syn concentration,  $n_{tot,x=L}^*$ .

$$\text{At } x^* = L^*: \quad \frac{dn_{free}^*}{dx^*} = 0, \quad n_{tot}^* = n_{tot,x=L}^*. \quad (31a,b)$$

It is convenient to define the dimensionless concentration (for all  $\alpha$ -syn concentration components) as:

$$n = n^* / n_{x=L}^*. \quad (32)$$

This allows recasting Eq. (31b) as follows:

$$n_{tot,x=L} = 1. \quad (33)$$

The dimensionless total flux of  $\alpha$ -syn is then defined as follows:

$$j_{tot} = \frac{j_{tot}^*}{n_{x=L}^* v_a^*}. \quad (34)$$

### 2.2.2. A perturbation solution of the full slow axonal transport model for the case of small cargo diffusivity and small dynein velocity

Unless proteins are MT-bound, such as tau or MAP2, slow axonal transport proteins are usually not transported along the axon as single particles but as a part of protein complexes. Neurofilaments, which are moved in slow component-a, are transported as polymers [31,32]. Cytosolic proteins also assemble in some kind of protein complexes when transported in SCb [12,26,33]. Each structure probably consists of hundreds of proteins [10] and includes different cytosolic proteins [34,35]. Because diffusivity of such multiprotein complexes is expected to be very small, we investigated how Eqs. (22)-(26) can be simplified for the limiting case of vanishing diffusivity of free proteins. Our goal is to understand whether after such simplification the model is capable of simulating cargo transport against the cargo concentration gradient.

We assumed that  $D_{n_{free}}^*$  is a small parameter. The following perturbation expansions are utilized:

$$n_a^* = n_a^{*(0)} + D_{n_{free}}^* n_a^{*(1)} + \dots, \quad (35)$$

$$n_r^* = n_r^{*(0)} + D_{n_{free}}^* n_r^{*(1)} + \dots, \quad (36)$$

$$n_{a0}^* = n_{a0}^{*(0)} + D_{n_{free}}^* n_{a0}^{*(1)} + \dots, \quad (37)$$

$$n_{r0}^* = n_{r0}^{*(0)} + D_{n_{free}}^* n_{r0}^{*(1)} + \dots, \quad (38)$$

$$n_{free}^* = n_{free}^{*(0)} + D_{n_{free}}^* n_{free}^{*(1)} + \dots. \quad (39)$$

Using Eqs. (37)-(39), Eq. (26) is recast as:

$$\begin{aligned} D_{n_{free}}^* \frac{d^2 n_{free}^{*(0)}}{dx^{*2}} + \left( D_{n_{free}}^* \right)^2 \frac{d^2 n_{free}^{*(1)}}{dx^{*2}} + \gamma_{off,a}^* n_{a0}^{*(0)} + D_{n_{free}}^* \gamma_{off,a}^* n_{a0}^{*(1)} + \gamma_{off,r}^* n_{r0}^{*(0)} + D_{n_{free}}^* \gamma_{off,r}^* n_{r0}^{*(1)} \\ - \left( \gamma_{on,a}^* + \gamma_{on,r}^* \right) n_{free}^{*(0)} - D_{n_{free}}^* \left( \gamma_{on,a}^* + \gamma_{on,r}^* \right) n_{free}^{*(1)} - \frac{n_{free}^{*(0)} \ln(2)}{T_{1/2,free}^*} - D_{n_{free}}^* \frac{n_{free}^{*(1)} \ln(2)}{T_{1/2,free}^*} = 0. \end{aligned} \quad (40)$$

By separating the terms that do and do not contain the small parameter  $D_{n_{free}}^*$ , and equating the terms that do not contain  $D_{n_{free}}^*$  to zero, the following is obtained:

$$\gamma_{off,a}^* n_{a0}^{*(0)} + \gamma_{off,r}^* n_{r0}^{*(0)} - (\gamma_{on,a}^* + \gamma_{on,r}^*) n_{free}^{*(0)} - \frac{n_{free}^{*(0)} \ln(2)}{T_{1/2,free}^*} = 0. \quad (41)$$

By using Eq. (35)-(39) in Eq. (22)-(25), separating the terms that do and do not contain the small parameter  $D_{n_{free}}^*$ , and equating the terms that do not contain  $D_{n_{free}}^*$  to zero, the following is obtained:

$$-v_a^* \frac{dn_a^{*(0)}}{dx^*} - \gamma_{10}^* n_a^{*(0)} + \gamma_{01}^* n_{a0}^{*(0)} = 0, \quad (42)$$

$$v_r^* \frac{dn_r^{*(0)}}{dx^*} - \gamma_{10}^* n_r^{*(0)} + \gamma_{01}^* n_{r0}^{*(0)} = 0, \quad (43)$$

$$-(\gamma_{01}^* + \gamma_{ar}^* + \gamma_{off,a}^*) n_{a0}^{*(0)} + \gamma_{10}^* n_a^{*(0)} + \gamma_{ra}^* n_{r0}^{*(0)} + \gamma_{on,a}^* n_{free}^{*(0)} = 0, \quad (44)$$

$$-(\gamma_{01}^* + \gamma_{ra}^* + \gamma_{off,r}^*) n_{r0}^{*(0)} + \gamma_{10}^* n_r^{*(0)} + \gamma_{ar}^* n_{a0}^{*(0)} + \gamma_{on,r}^* n_{free}^{*(0)} = 0. \quad (45)$$

Because we investigate the case of dynein dysfunction, which we simulate by a vanishing dynein velocity, we also assumed that  $v_r^*$  is a small parameter. The following perturbation expansions are utilized:

$$n_a^{*(0)} = n_{a,0}^{*(0)} + v_r^* n_{a,1}^{*(0)} + \dots, \quad (46)$$

$$n_r^{*(0)} = n_{r,0}^{*(0)} + v_r^* n_{r,1}^{*(0)} + \dots. \quad (47)$$

$$n_{a0}^{*(0)} = n_{a0,0}^{*(0)} + v_r^* n_{a0,1}^{*(0)} + \dots, \quad (48)$$

$$n_{r0}^{*(0)} = n_{r0,0}^{*(0)} + v_r^* n_{r0,1}^{*(0)} + \dots, \quad (49)$$

$$n_{free}^{*(0)} = n_{free,0}^{*(0)} + v_r^* n_{free,1}^{*(0)} + \dots. \quad (50)$$

By using Eqs. (46)-(50) in Eqs. (41)-(45), separating the terms that do and do not contain the small parameter  $v_r^*$ , and equating the terms that do not contain  $v_r^*$  to zero, the following is obtained:

$$\gamma_{off,a}^* n_{a0,0}^{*(0)} + \gamma_{off,r}^* n_{r0,0}^{*(0)} - (\gamma_{on,a}^* + \gamma_{on,r}^*) n_{free,0}^{*(0)} - \frac{n_{free,0}^{*(0)} \ln(2)}{T_{1/2,free}^*} = 0, \quad (51)$$

$$-v_a^* \frac{dn_{a,0}^{*(0)}}{dx^*} - \gamma_{10}^* n_{a,0}^{*(0)} + \gamma_{01}^* n_{a0,0}^{*(0)} = 0, \quad (52)$$

$$-\gamma_{10}^* n_{r,0}^{*(0)} + \gamma_{01}^* n_{r,0}^{*(0)} = 0, \quad (53)$$

$$-(\gamma_{01}^* + \gamma_{ar}^* + \gamma_{off,a}^*) n_{a,0}^{*(0)} + \gamma_{10}^* n_{a,0}^{*(0)} + \gamma_{ra}^* n_{r,0}^{*(0)} + \gamma_{on,a}^* n_{free,0}^{*(0)} = 0, \quad (54)$$

$$-(\gamma_{01}^* + \gamma_{ra}^* + \gamma_{off,r}^*) n_{r,0}^{*(0)} + \gamma_{10}^* n_{r,0}^{*(0)} + \gamma_{ar}^* n_{a,0}^{*(0)} + \gamma_{on,r}^* n_{free,0}^{*(0)} = 0. \quad (55)$$

From Eq. (53):

$$n_{r,0}^{*(0)} = \frac{\gamma_{10}^*}{\gamma_{01}^*} n_{r,0}^{*(0)}. \quad (56)$$

Eqs. (51), (52), (54), and (55) are then recast as:

$$\gamma_{off,a}^* n_{a,0}^{*(0)} + \gamma_{off,r}^* \frac{\gamma_{10}^*}{\gamma_{01}^*} n_{r,0}^{*(0)} - \left[ \gamma_{on,a}^* + \gamma_{on,r}^* + \frac{\ln(2)}{T_{1/2,free}^*} \right] n_{free,0}^{*(0)} = 0, \quad (57)$$

$$-v_a^* \frac{dn_{a,0}^{*(0)}}{dx^*} - \gamma_{10}^* n_{a,0}^{*(0)} + \gamma_{01}^* n_{a,0}^{*(0)} = 0, \quad (52)$$

$$-(\gamma_{01}^* + \gamma_{ar}^* + \gamma_{off,a}^*) n_{a,0}^{*(0)} + \gamma_{10}^* n_{a,0}^{*(0)} + \gamma_{ra}^* \frac{\gamma_{10}^*}{\gamma_{01}^*} n_{r,0}^{*(0)} + \gamma_{on,a}^* n_{free,0}^{*(0)} = 0, \quad (58)$$

$$-(\gamma_{ra}^* + \gamma_{off,r}^*) \frac{\gamma_{10}^*}{\gamma_{01}^*} n_{r,0}^{*(0)} + \gamma_{ar}^* n_{a,0}^{*(0)} + \gamma_{on,r}^* n_{free,0}^{*(0)} = 0. \quad (59)$$

Eliminating  $n_{a,0}^{*(0)}$ ,  $n_{r,0}^{*(0)}$ , and  $n_{free,0}^{*(0)}$  from Eqs. (52), (57)-(59), the following equation for  $n_{a,0}^{*(0)}$  was obtained:

$$v_a^* \left[ \ln(2) \left( \gamma_{off,r}^* (\gamma_{01}^* + \gamma_{ar}^* + \gamma_{off,a}^*) + \gamma_{ra}^* (\gamma_{01}^* + \gamma_{off,a}^*) \right) + \gamma_{01}^* T_{1/2,free}^* \left( \gamma_{off,r}^* \gamma_{on,a}^* + \gamma_{ra}^* (\gamma_{on,a}^* + \gamma_{on,r}^*) \right) \right] \frac{dn_{a,0}^{*(0)}}{dx^*} + \gamma_{10}^* \ln(2) \left( \gamma_{ar}^* \gamma_{off,r}^* + \gamma_{off,a}^* (\gamma_{off,r}^* + \gamma_{ra}^*) \right) n_{a,0}^{*(0)} = 0. \quad (60)$$

For the case when  $D_{n_{free}}^*$  and  $v_r^*$  are small, the flux of cargos is given by

$$j_{tot}^*(x^*) = v_a^* n_a^*. \quad (61)$$

Eq. (60) is solved subject to the following boundary condition, which requires the flux of  $\alpha$ -syn entering the axon to be the same as in the full slow axonal transport model:

$$\text{At } x^* = 0: \quad j_{tot,x=0}^* = v_a^* n_{a,0}^{*(0)}(0). \quad (62)$$

The solution of Eq. (60) with boundary condition (62) is

$$n_{a,0}^{*(0)} = \frac{j_{tot,x=0}^*}{v_a^*} \times \exp \left[ - \frac{\gamma_{10}^* \ln(2) (\gamma_{ar}^* \gamma_{off,r}^* + \gamma_{off,a}^* (\gamma_{off,r}^* + \gamma_{ra}^*))}{\gamma_{01}^* T_{1/2,free}^* v_a^* (\gamma_{off,r}^* \gamma_{on,a}^* + \gamma_{ra}^* (\gamma_{on,a}^* + \gamma_{on,r}^*)) + v_a^* \ln(2) (\gamma_{off,r}^* (\gamma_{01}^* + \gamma_{ar}^* + \gamma_{off,a}^*) + \gamma_{ra}^* (\gamma_{01}^* + \gamma_{off,a}^*))} x^* \right]. \quad (63)$$

Note that the solution given by Eq. (63) has the form  $\frac{j_{tot,x=0}^*}{v_a^*} \exp(-ax^*)$ , where the concentration decay

constant  $a > 0$ , which means that  $n_{a,0}^{*(0)}$  cannot describe an increasing concentration toward the terminal.

If  $a$  is small, the solution is  $n_{a,0}^{*(0)} \approx \frac{j_{tot,x=0}^*}{v_a^*}$ , which is a constant value.

By eliminating  $n_{a,0}^{*(0)}$  and  $n_{free,0}^{*(0)}$  from Eqs. (57), (58), and (59), the following equation for  $n_{r,0}^{*(0)}$  is obtained:

$$n_{r,0}^{*(0)} = \frac{\gamma_{01}^* (\gamma_{ar}^* \ln(2) + \gamma_{on,r}^* T_{1/2,free}^* (\gamma_{ar}^* + \gamma_{off,a}^*)) + \gamma_{ar}^* \gamma_{on,a}^* T_{1/2,free}^*}{\ln(2) (\gamma_{off,r}^* (\gamma_{01}^* + \gamma_{ar}^* + \gamma_{off,a}^*) + \gamma_{ra}^* (\gamma_{01}^* + \gamma_{off,a}^*)) + \gamma_{01}^* T_{1/2,free}^* (\gamma_{off,r}^* \gamma_{on,a}^* + \gamma_{ra}^* (\gamma_{on,a}^* + \gamma_{on,r}^*))} n_{a,0}^{*(0)}. \quad (64)$$

By eliminating  $n_{r,0}^{*(0)}$  and  $n_{free,0}^{*(0)}$  from Eqs. (57), (58), and (59), the following equation for  $n_{a,0}^{*(0)}$  is obtained:

$$n_{a,0}^{*(0)} = \frac{\gamma_{10}^* (\ln(2) (\gamma_{off,r}^* + \gamma_{ra}^*) + \gamma_{off,r}^* \gamma_{on,a}^* T_{1/2,free}^* + \gamma_{ra}^* T_{1/2,free}^* (\gamma_{on,a}^* + \gamma_{on,r}^*))}{\ln(2) (\gamma_{off,r}^* (\gamma_{01}^* + \gamma_{ar}^* + \gamma_{off,a}^*) + \gamma_{ra}^* (\gamma_{01}^* + \gamma_{off,a}^*)) + \gamma_{01}^* T_{1/2,free}^* (\gamma_{off,r}^* \gamma_{on,a}^* + \gamma_{ra}^* (\gamma_{on,a}^* + \gamma_{on,r}^*))} n_{a,0}^{*(0)}. \quad (65)$$

By eliminating  $n_{r,0}^{*(0)}$  and  $n_{a,0}^{*(0)}$  from Eqs. (57), (58), and (59), the following equation for  $n_{free,0}^{*(0)}$  is obtained:

$$n_{free,0}^{*(0)} = \frac{\gamma_{10}^{*} T_{1/2,free}^{*} \left( \gamma_{ar}^{*} \gamma_{off,r}^{*} + \gamma_{off,a}^{*} \left( \gamma_{off,r}^{*} + \gamma_{ra}^{*} \right) \right)}{\ln(2) \left( \gamma_{off,r}^{*} \left( \gamma_{01}^{*} + \gamma_{ar}^{*} + \gamma_{off,a}^{*} \right) + \gamma_{ra}^{*} \left( \gamma_{01}^{*} + \gamma_{off,a}^{*} \right) \right) + \gamma_{01}^{*} T_{1/2,free}^{*} \left( \gamma_{off,r}^{*} \gamma_{on,a}^{*} + \gamma_{ra}^{*} \left( \gamma_{on,a}^{*} + \gamma_{on,r}^{*} \right) \right)} n_{a,0}^{*(0)}. \quad (66)$$

The total concentration,  $n_{tot,0}^{*(0)}$ , can be obtained by finding the sum of concentration components given by Eqs. (56) and (63)-(66).

### 2.3. Sensitivity of the concentration boundary layer thickness to dynein velocity

The thickness of the concentration boundary layer is defined as the distance from the axon tip to the location  $x_{\delta}^{*}$  ( $\delta^{*} = L^{*} - x_{\delta}^{*}$ , see Fig. 4) where the total cargo concentration drops by 99%, which means where it reaches the value

$$n_{tot}^{*}(x_{\delta}^{*}) = n_{tot,x=0}^{*} + 0.01 \left[ n_{tot,x=L}^{*} - n_{tot,x=0}^{*} \right]. \quad (67)$$

The sensitivity of  $\delta^{*}$  to the dynein velocity  $v_r^{*}$  is calculated as follows [36-39]:

$$\frac{\partial \delta^{*}}{\partial v_r^{*}} \approx \frac{\delta^{*}(v_r^{*}) - \delta^{*}(v_r^{*} - \Delta v_r^{*})}{\Delta v_r^{*}} \bigg|_{\text{other parameters kept constant}}, \quad (68)$$

where  $\Delta v_r^{*} = 10^{-3} v_r^{*}$  is the step size. The independence of the sensitivity to the step size was tested by varying the step sizes.

To make the sensitivity independent of parameter magnitude, the non-dimensional relative sensitivity was calculated as [37,40]:

$$S_{v_r^{*}}^{\delta^{*}} = \frac{v_r^{*}}{\delta^{*}} \frac{\partial \delta^{*}}{\partial v_r^{*}}. \quad (69)$$

### 2.4. Finding best-fit values of kinetic constants by multi-objective optimization

To solve the anterograde-retrograde transport problem given by Eqs. (1) and (2) with boundary conditions (3) and (4) values of kinetic constants  $\gamma_{ar}^{*}$  and  $\gamma_{ra}^{*}$  are needed. In order to solve the full slow axonal transport problem given by Eqs. (22)-(26) with boundary conditions (27) and (31) values of all eight kinetic constants given in Table S3 must be determined. We determined best-fit values of these kinetics

constants by multi-objective optimization [41-45]. We minimized the following objective (penalty) function, which combines three different effects:

$$err = \sum_{j=1}^{N_{fit}} \left( n_{tot,j} - n_{tot,estimate,j} \right)^2 + \omega_1 \sum_{j=1}^{N_{fit}} \left( v_{av,j}^* - v_{av,estimate}^* \right)^2 + \omega_2. \quad (70)$$

The first term on the right-hand side of Eq. (70) minimizes the difference between the computed concentration,  $n_{tot,j}$ , and the synthetic data,  $n_{tot,estimate,j}$ , in  $N_{fit}$  uniformly spaced points along the length of the axon. We know that  $\alpha$ -syn predominantly localizes in the presynaptic terminal [46-48]. To simulate this, we assumed that the concentration of synthetic data is given by the following modified logistic function:

$$n_{tot,estimate,j} = n_{tot,x=0} + (1 - n_{tot,x=0}) \left( 1 - \tanh \left[ k^* (L^* - x^*) \right] \right), \quad (71)$$

where  $k^*$  is the logistic growth rate, a parameter that characterizes the steepness of the S-shaped curve used in approximating the distribution of  $\alpha$ -syn along the axon length. We used  $k^* = 10^{-3} \text{ 1/}\mu\text{m}$ . The distribution given by Eq. (71) is shown by hollow circles in Fig. 4.

The purpose of the second term on the right-hand side of Eq. (70) is to simulate the difference between the numerically predicted  $\alpha$ -syn velocity,  $v_{av,j}^*$ , and experimentally reported  $\alpha$ -syn velocity,  $v_{av,estimate}^*$ . We used  $0.05 \text{ }\mu\text{m/s}$  for  $v_{av,estimate}^*$ , a value which is in the middle of the experimentally reported range of SCb velocity, 2-8 mm/day [12]. In the second term, we also used  $\omega_1 = 1 \text{ s}^2/\mu\text{m}^2$ . This value was selected based on numerical experimentation, to avoid overfitting either  $\alpha$ -syn concentration or its average velocity, see ref. [49].

The third term on the right-hand side of Eq. (70) is set to a large value,  $\omega_2 = 10^8$ , if any of  $\alpha$ -syn concentration components,  $n_{a,j}$ ,  $n_{r,j}$ ,  $n_{a0,j}$ ,  $n_{r0,j}$ ,  $n_{free,j}$ , or  $\alpha$ -syn flux,  $j_{tot}$  ( $j=1, \dots, N_{fit}$ ) becomes negative. The latter condition comes from the assumption that  $\alpha$ -syn is not synthesized at the terminal, and that the half-life of  $\alpha$ -syn is finite; therefore, the terminal must be supplied by  $\alpha$ -syn from the soma. Best-fit values of kinetic constants for the anterograde-retrograde transport model are given in Table S4, and the best-fit values of kinetic constants for the full slow axonal transport model are given in Table S5.

## 2.5. Numerical solution

Eqs. (1) and (2) were solved using MATLAB's BVP5C solver (MATLAB R2020b, MathWorks, Natick, MA, USA). For the full slow axonal transport model, we first eliminated  $n_{a0}^*(x^*)$  and  $n_{r0}^*(x^*)$  from Eqs. (22)-(26) using Eqs. (24) and (25). The resulting system of ordinary differential equations of the fourth order was again solved using MATLAB's BVP5C solver. To determine values of kinetic constants (Tables S4 and S5), we used MULTISTART with the local solver FMINCON. These routines are part of MATLAB's Optimization Toolbox. We used 1000 random points plus the initial point given in Table S3 as starting points in searching for the global minimum. We followed the numerical procedure described in ref. [50].

### 3. Results

#### 3.1. Anterograde and retrograde axonal transport model without pausing states and diffusion fails to simulate an increase of cargo concentration toward the axon tip if dynein velocity is small

First the results obtained with the anterograde-retrograde model (Fig. 2a) are discussed. For an SCb protein that is predominantly localized in the presynaptic terminal ( $\alpha$ -syn data were used for our simulations) the concentrations of proteins pulled by anterograde and retrograde motors remain constant along most of the axon length, and then sharply increase near the axon tip (Fig. 3a,b). A decrease of the dynein velocity results in a decrease of the boundary layer thickness, which is defined as a region where cargo concentrations change from a constant low value they take in the most of the axon length to a high concentration they take at the axon tip (Fig. 3a,b). If the dynein velocity approaches zero, the anterograde and retrograde concentrations are represented by horizontal lines (no concentration increase toward the axonal tip, see the curves corresponding to the analytical solution in Fig. 3a,b).

A similar decrease of the boundary layer thickness with a decrease of the dynein velocity is observed in Fig. 4, which displays the total cargo concentration. In the model given by Eqs. (1) and (2) the boundary layer thickness is very sensitive to the dynein velocity. The dimensionless sensitivity,  $S_{v_r}^{\delta^*}$ , calculated using Eq. (69) for this model is 9.21. Therefore, in addition to the base case, corresponding to  $v_r^* = 0.7 \mu\text{m/s}$ , we show two more concentration distributions, corresponding to situations where the dynein velocity is only slightly decreased, by factors of 0.8 and 0.5 (see Figs. 3 and 4). This is done to avoid the situation when the boundary layer thickness becomes too small, so that cargo concentration distributions near the axon tip become almost vertical (this would happen if the dynein velocity is decreased further).



The values of kinetic constants used for computing all curves Figs. 3, 4, and S1 were determined using  $v_r^* = 0.7 \mu\text{m/s}$ . Otherwise, if kinetic constants were optimized for each value of  $v_r^*$ , all three numerical curves would be the same and would give a perfect fit with the synthetic data. Numerically computed curves in Figs. 3 and 4 exhibit a constant concentration along most of the axonal length which is followed by a sharp concentration increase near the axon tip. This feature is due to the concentration distribution of synthetic data (see Eq. (68)). The sharp increase of the total concentration near the terminal predicted by synthetic data (see hollow circles in Fig. 4) simulates presynaptic localization of  $\alpha$ -syn. Since values of kinetic constants in the model are determined such that numerically predicted total cargo concentration would fit the synthetic data distribution, the shapes of the numerical curves in Fig. 4 correspond to the synthetic data distribution. The important feature in Fig. 4 is the inability of the model to simulate the increase of cargo concentration toward the axonal tip if dynein velocity tends to zero (see the curve that represents the analytical solution).

The total flux of cargos (defined in Eq. (5)) is constant independent of the position in the axon (Fig. S1) because the cargo flux at the hillock is imposed by Eq. (3) and there is no cargo degradation in the model given by Eqs. (1) and (2).

### 3.2. For small cargo diffusivity, the full slow axonal transport model fails to simulate an increase of cargo concentration toward the axon tip if dynein velocity is small

Now the results obtained with the full slow axonal transport model (Fig. 2b) are discussed. Cargo concentrations predicted by the full slow axonal transport model given by Eqs. (22)-(26) are less sensitive to the dynein velocity than in the model given by Eqs. (1) and (2). The dimensionless sensitivity,  $S_{v_r^*}^{\sigma^*}$ , calculated using Eq. (69) for the full slow axonal transport model is 1.28. Therefore, in Figs. 5, 6, and S2-S4 we have shown results for the base dynein velocity ( $v_r^* = 0.7 \mu\text{m/s}$ ) and two much smaller values of dynein velocity,  $v_r^* = 0.7 \times 10^{-1}$  and  $0.7 \times 10^{-2} \mu\text{m/s}$ . Again, the values of kinetic constants used for computing all curves in Figs. 5, 6, and S2-S4 were determined using  $v_r^* = 0.7 \mu\text{m/s}$ . The analytical solution obtained for the case when the cargo diffusivity and dynein velocity both approach zero predicts almost uniform cargo concentrations (Figs. 5, 6, S2, and S3a). Indeed, for the results displayed in Figs. 5 and 6 the concentration decay constant  $a$  defined in the paragraph after Eq. (63) equals to  $3.59 \times 10^{-13} 1/\mu\text{m}$ . This means that the exponential function in Eq. (63) is almost identical to unity and  $n_{a,0}^{*(0)}$  is

constant. This explains why neurons for a mutation when dynein velocity becomes small are not capable of supporting high cargo concentration at the axon terminal.

For the full slow axonal transport model, the cargo flux displayed in Fig. S3b remains constant because of a large value of cargo half-life used in computations (Fig. S3b is computed for  $T_{1/2,free}^* = 5.76 \times 10^{10}$  s, assuming that  $\alpha$ -syn is protected from degradation during its transport in the axon). Computations for a smaller half-life of cargos ( $T_{1/2,free}^* = 5.76 \times 10^4$  s) predict a decay of the total flux of cargos near the axon tip (Fig. S4b). This is because the model assumes that  $\alpha$ -syn can be destroyed in proteasomes only in the free (cytosolic) state. Since the concentration of free  $\alpha$ -syn increases toward the tip (Fig. S4a), there is more  $\alpha$ -syn degradation near the tip. Hence, the total flux of  $\alpha$ -syn decreases near the tip (Fig. S4b).

#### 4. Discussion, limitations of the model, and future directions

The results obtained in this paper suggest that failing dynein function results in the inability of neurons to transport cargo against its concentration gradient, that is to support a cargo distribution where the cargo concentration is low in the soma and high in the terminal. This result holds as long as the cargo diffusivity is small, which applies to cargos transported as polymers or as a part of multiprotein complexes. The reason why dynein motors are needed to support such distribution is that with the anterograde-only motion of cargo there is no way to impose a boundary condition at the axon tip that is to require an elevated cargo concentration at the tip. A model that includes anterograde transport alone only allows for the imposition of a boundary condition at the axon hillock. Our results, counter-intuitively, suggest that dying-back degeneration may result from dynein dysfunction because of the inability of the neuron to support a high cargo concentration at the terminal. Our results are testable and falsifiable. Experimental research could test whether neurons with dynein dysfunction are indeed unable to support a cargo distribution in an axon that increases with the distance from the soma.

Limitations of our model are related to neglecting local protein synthesis and local controlled protein degradation. These effects should be included in future models and considered in future research.

Data accessibility. This article has no additional data.

Authors' contributions. IAK and AVK contributed equally to performing computational work and article preparation. Both authors approved the final version of the manuscript and agreed to be accountable for all aspects of the work.

Competing interests. We have no competing interests.

Funding statement. IAK acknowledges the fellowship support of the Paul and Daisy Soros Fellowship for New Americans and the NIH/National Institute of Mental Health (NIMH) Ruth L. Kirchstein NRSA (F30 MH122076-01). AVK acknowledges the support of the National Science Foundation (award CBET-2042834) and the Alexander von Humboldt Foundation through the Humboldt Research Award.

# References

1. Goldstein LSB, Yang ZH. 2000 Microtubule-based transport systems in neurons: The roles of kinesins and dyneins. *Annu. Rev. Neurosci.* **23**, 39-71.
2. Hanemann C, Ludolph A. 2005 Motor protein diseases of the nervous system. *Amyotrophic Lateral Sclerosis and Other Motor Neuron Disorders* **6**, 197-201. (doi:10.1080/14660820510035360)
3. Liu X, Rizzo V, Puthanveetil SV. 2012 Pathologies of axonal transport in neurodegenerative diseases. *Translational Neuroscience* **3**, 355-372. (doi:10.2478/s13380-012-0044-7)
4. Brady ST, Morfini GA. 2017 Regulation of motor proteins, axonal transport deficits and adult-onset neurodegenerative diseases. *Neurobiol. Dis.* **105**, 273-282. (doi:10.1016/j.nbd.2017.04.010)
5. Markworth R, Baehr M, Burk K. 2021 Held up in traffic-defects in the trafficking machinery in charcot-marie-tooth disease. *Frontiers in Molecular Neuroscience* **14**, 695294. (doi:10.3389/fnmol.2021.695294)
6. Chen Xiang-Jun, Xu Huan, Cooper HM, Liu Yaobo. 2014 Cytoplasmic dynein: A key player in neurodegenerative and neurodevelopmental diseases. *Science China-Life Sciences* **57**, 372-377. (doi:10.1007/s11427-014-4639-9)
7. Eschbach J, Sinniger J, Bouitbir J, Fergani A, Schlagowski A, Zoll J, Geny B, Rene F, Larmet Y, Marion V, Baloh RH, Harms MB, Shy ME, Messadeq N, Weydt P, Loeffler J, Ludolph AC, Dupuis L. 2013 Dynein mutations associated with hereditary motor neuropathies impair mitochondrial morphology and function with age. *Neurobiol. Dis.* **58**, 220-230. (doi:10.1016/j.nbd.2013.05.015)
8. Nandini S, Calderon JLC, Sabblah TT, Love R, King LE, King SJ. 2019 Mice with an autosomal dominant charcot-marie-tooth type 2O disease mutation in both dynein alleles display severe motor-sensory phenotypes. *Scientific Reports* **9**, 11979. (doi:10.1038/s41598-019-48431-7)
9. Marzo MG, Griswold JM, Ruff KM, Buchmeier RE, Fees CP, Markus SM. 2019 Molecular basis for dyneinopathies reveals insight into dynein regulation and dysfunction. *Elife* **8**, e47246. (doi:10.7554/eLife.47246)
10. Brown A. 2016 Axonal transport. In D. Pfaff, & N. Volkow (Eds.), *Neuroscience in the 21st Century* (pp. 379) Springer. (doi:10.1007/978-1-4939-3474-4\_14)
11. Kuznetsov IA, Kuznetsov AV. 2022 Bidirectional, unlike unidirectional transport, allows transporting axonal cargos against their concentration gradient. *Journal of Theoretical Biology* **546**, 111161. (doi:doi.org/10.1016/j.jtbi.2022.111161)
12. Roy S, Winton MJ, Black MM, Trojanowski JQ, Lee VMY. 2008 Cytoskeletal requirements in axonal transport of slow component-b. *Journal of Neuroscience* **28**, 5248-5256. (doi:10.1523/JNEUROSCI.0309-08.2008)
13. Wang L, Ho CL, Sun DM, Liem RKH, Brown A. 2000 Rapid movement of axonal neurofilaments interrupted by prolonged pauses. *Nat. Cell Biol.* **2**, 137-141.

14. Roy S, Coffee P, Smith G, Liem RKH, Brady ST, Black MM. 2000 Neurofilaments are transported rapidly but intermittently in axons: Implications for slow axonal transport. *Journal of Neuroscience* **20**, 6849-6861.
15. Jensen P, Nielsen M, Jakes R, Dotti G, Goedert M. 1998 Binding of alpha-synuclein to brain vesicles is abolished by familial Parkinson's disease mutation. *J. Biol. Chem.* **273**, 26292-26294. (doi:10.1074/jbc.273.41.26292)
16. Jensen P, Li J, Dahlstrom A, Dotti C. 1999 Axonal transport of synucleins is mediated by all rate components. *Eur. J. Neurosci.* **11**, 3369-3376. (doi:10.1046/j.1460-9568.1999.00754.x)
17. Yang M, Hasadsri L, Woods WS, George JM. 2010 Dynamic transport and localization of alpha-synuclein in primary hippocampal neurons. *Molecular Neurodegeneration* **5**, 9. (doi:10.1186/1750-1326-5-9)
18. Tang Y, Das U, Scott DA, Roy S. 2012 The slow axonal transport of alpha-synuclein-mechanistic commonalities amongst diverse cytosolic cargoes. *Cytoskeleton* **69**, 506-513. (doi:10.1002/cm.21019)
19. Lashuel HA, Overk CR, Oueslati A, Masliah E. 2013 The many faces of alpha-synuclein: From structure and toxicity to therapeutic target. *Nature Reviews Neuroscience* **14**, 38-48. (doi:10.1038/nrn3406)
20. Charvin D, Medori R, Hauser RA, Rascol O. 2018 Therapeutic strategies for Parkinson disease: Beyond dopaminergic drugs. *Nature Reviews Drug Discovery* **17**, 804-822. (doi:10.1038/nrd.2018.136)
21. Shahmoradian SH, Lewis AJ, Genoud C, Hench J, Moors TE, Navarro PP, Castano-Diez D, Schweighauser G, Graff-Meyer A, Godie KN, Sutterlin R, Huisman E, Ingrassia A, de Gier Y, Rozemuller AJM, Wang J, De Paepe A, Erny J, Staempfli A, Hoernschemeyer J, Grosserueschkamp F, Niedieker D, El-Mashtoly SF, Quadri M, Van IJcken WFJ, Bonifati V, Gerwert K, Bohrmann B, Frank S, Britschgi M, Stahlberg H, Van de Berg WDJ, Lauer ME. 2019 Lewy pathology in Parkinson's disease consists of crowded organelles and lipid membranes. *Nat. Neurosci.* **22**, 1099-1109. (doi:10.1038/s41593-019-0423-2)
22. Utton M, Noble W, Hill J, Anderton B, Hanger D. 2005 Molecular motors implicated in the axonal transport of tau and alpha-synuclein. *J. Cell. Sci.* **118**, 4645-4654. (doi:10.1242/jcs.02558)
23. Jung P, Brown A. 2009 Modeling the slowing of neurofilament transport along the mouse sciatic nerve. *Physical Biology* **6**, 046002. (doi:10.1088/1478-3975/6/4/046002)
24. Kuznetsov AV, Avramenko AA, Blinov DG. 2009 Effect of protein degradation in the axon on the speed of the bell-shaped concentration wave in slow axonal transport. *Int. Commun. Heat Mass Transfer* **36**, 641-645. (doi:10.1016/j.icheatmasstransfer.2009.04.002)
25. Kuznetsov AV, Avramenko AA, Blinov DG. 2009 Macroscopic modeling of slow axonal transport of rapidly diffusible soluble proteins. *Int. Commun. Heat Mass Transfer* **36**, 293-296. (doi:10.1016/j.icheatmasstransfer.2009.01.005)

26. Roy S. 2014 Seeing the unseen: The hidden world of slow axonal transport. *Neuroscientist* **20**, 71-81. (doi:10.1177/1073858413498306)
27. Raichur A, Vali S, Gorin F. 2006 Dynamic modeling of alpha-synuclein aggregation for the sporadic and genetic forms of Parkinson's disease. *Neuroscience* **142**, 859-870. (doi:10.1016/j.neuroscience.2006.06.052)
28. Li WX, Hoffman PN, Stirling W, Price DL, Lee MK. 2004 Axonal transport of human alpha-synuclein slows with aging but is not affected by familial Parkinson's disease-linked mutations. *J. Neurochem.* **88**, 401-410. (doi:10.1046/j.1471-4159.2003.02166.x)
29. Rosenberg T, Gal-Ben-Ari S, Dieterich DC, Kreutz MR, Ziv NE, Gundelfinger ED, Rosenblum K. 2014 The roles of protein expression in synaptic plasticity and memory consolidation. *Frontiers in Molecular Neuroscience* **7**, 86. (doi:10.3389/fnmol.2014.00086)
30. Kuznetsov IA, Kuznetsov AV. 2015 A comparison between the diffusion-reaction and slow axonal transport models for predicting tau distribution along an axon. *Mathematical Medicine and Biology* **32**, 263-283.
31. Yan Y, Brown A. 2005 Neurofilament polymer transport in axons. *Journal of Neuroscience* **25**, 7014-7021. (doi:10.1523/JNEUROSCI.2001-05.2005)
32. Maday S, Twelvetrees AE, Moughamian AJ, Holzbaur ELF. 2014 Axonal transport: Cargo-specific mechanisms of motility and regulation. *Neuron* **84**, 292-309. (doi:10.1016/j.neuron.2014.10.019)
33. Roy S, Winton MJ, Black MM, Trojanowski JQ, Lee VM-. 2007 Rapid and intermittent cotransport of slow component-b proteins. *Journal of Neuroscience* **27**, 3131-3138. (doi:10.1523/JNEUROSCI.4999-06.2007)
34. Scott DA, Das U, Tang Y, Roy S. 2011 Mechanistic logic underlying the axonal transport of cytosolic proteins. *Neuron* **70**, 441-454. (doi:10.1016/j.neuron.2011.03.022)
35. Roy S. 2020 Finding order in slow axonal transport. *Curr. Opin. Neurobiol.* **63**, 87-94. (doi:10.1016/j.conb.2020.03.015)
36. Beck JV, Arnold KJ. 1977 *Parameter Estimation in Science and Engineering*. New York: Wiley.
37. Zadeh KS, Montas HJ. 2010 A class of exact solutions for biomacromolecule diffusion-reaction in live cells. *J. Theor. Biol.* **264**, 914-933. (doi:10.1016/j.jtbi.2010.03.028)
38. Zi Z. 2011 Sensitivity analysis approaches applied to systems biology models. *IET Systems Biology* **5**, 336-346. (doi:10.1049/iet-syb.2011.0015)
39. Kuznetsov IA, Kuznetsov AV. 2019 Investigating sensitivity coefficients characterizing the response of a model of tau protein transport in an axon to model parameters. *Comput. Methods Biomech. Biomed. Engin.* **22**, 71-83. (doi:10.1080/10255842.2018.1534233)

40. Kacser H, Burns J, Fell D. 1995 The control of flux. *Biochem. Soc. Trans.* **23**, 341-366. (doi:10.1042/bst0230341)
41. Kool JB, Parker JC, van Genuchten MT. 1987 Parameter estimation for unsaturated flow and transport models - A review. *Journal of Hydrology* **91**, 255-293. (doi:10.1016/0022-1694(87)90207-1)
42. Zadeh KS. 2008 Parameter estimation in flow through partially saturated porous materials. *Journal of Computational Physics* **227**, 10243-10262. (doi:10.1016/j.jcp.2008.09.007)
43. Zadeh KS, Shah SB. 2010 Mathematical modeling and parameter estimation of axonal cargo transport. *J. Comput. Neurosci.* **28**, 495-507. (doi:10.1007/s10827-010-0232-9)
44. Zadeh KS. 2011 A synergic simulation-optimization approach for analyzing biomolecular dynamics in living organisms. *Comput. Biol. Med.* **41**, 24-36. (doi:10.1016/j.combiomed.2010.11.002)
45. Zadeh KS, Montas HJ. 2014 Parametrization of flow processes in porous media by multiobjective inverse modeling. *Journal of Computational Physics* **259**, 390-401. (doi:10.1016/j.jcp.2013.12.001)
46. Li JY, Jensen PH, Dahlstrom A. 2002 Differential localization of alpha-, beta- and gamma-synucleins in the rat CNS. *Neuroscience* **113**, 463-478. (doi:10.1016/S0306-4522(02)00143-4)
47. Fortin D, Nemani V, Voglmaier S, Anthony M, Ryan T, Edwards R. 2005 Neural activity controls the synaptic accumulation of alpha-synuclein. *Journal of Neuroscience* **25**, 10913-10921. (doi:10.1523/JNEUROSCI.2922-05.2005)
48. Burre J. 2015 The synaptic function of alpha-synuclein. *Journal of Parkinsons Disease* **5**, 699-713. (doi:10.3233/JPD-150642)
49. Kuznetsov IA, Kuznetsov AV. 2017 Utilization of the bootstrap method for determining confidence intervals of parameters for a model of MAP1B protein transport in axons. *Journal of Theoretical Biology* **419**, 350-361.
50. Kuznetsov IA, Kuznetsov AV. 2018 Simulating the effect of formation of amyloid plaques on aggregation of tau protein. *Proceedings of the Royal Society A-Mathematical Physical and Engineering Sciences* **474**, 20180511. (doi:10.1098/rspa.2018.0511)
51. Nath S, Meuvis J, Hendrix J, Carl SA, Engelborghs Y. 2010 Early aggregation steps in alpha-synuclein as measured by FCS and FRET: Evidence for a contagious conformational change. *Biophys. J.* **98**, 1302-1311. (doi:10.1016/j.bpj.2009.12.4290)
52. Hannestad JK, Rocha S, Agnarsson B, Zhdanov VP, Wittung-Stafshede P, Hook F. 2020 Single-vesicle imaging reveals lipid-selective and stepwise membrane disruption by monomeric alpha-synuclein. *Proc. Natl. Acad. Sci. U. S. A.* **117**, 14178-14186.
53. Banks SML, Medeiros AT, McQuillan M, Busch DJ, Ibarraran-Viniegra AS, Sousa R, Lafer EM, Morgan JR. 2020 Hsc70 ameliorates the vesicle recycling defects caused by excess alpha-synuclein at synapses. *Eneuro* **7**, 0448-19.2020. (doi:10.1523/ENEURO.0448-19.2020)



54. Bennett MC, Bishop JF, Leng Y, Chock PB, Chase TN, Mouradian MM. 1999 Degradation of alpha-synuclein by proteasome. *J. Biol. Chem.* **274**, 33855-33858. (doi:10.1074/jbc.274.48.33855)
55. Schapira AHV, Lang AET, Fahn S (Eds.). (2010). *Movement disorders 4: Blue books of neurology series, volume 35*. Philadelphia, PA: Saunders.
56. George JL, Mok S, Moses D, Wilkins S, Bush AI, Cherny RA, Finkelstein DI. 2009 Targeting the progression of Parkinson's disease. *Current Neuropharmacology* **7**, 9-36.
57. Gupta A, Dawson TM. 2010 Chapter 10 - pathogenesis of Parkinson's disease. *Blue Books of Neurology* **34**, 155-169. (doi:10.1016/B978-1-4160-6641-5.00010-6)
58. Toba S, Jin M, Yamada M, Kumamoto K, Matsumoto S, Yasunaga T, Fukunaga Y, Miyazawa A, Fujita S, Itoh K, Fushiki S, Kojima H, Wanibuchi H, Arai Y, Nagai T, Hirotsune S. 2017 Alpha-synuclein facilitates to form short unconventional microtubules that have a unique function in the axonal transport. *Scientific Reports* **7**, 16386. (doi:10.1038/s41598-017-15575-3)
59. Saha A, Hill J, Utton M, Asuni A, Ackerley S, Grierson A, Miller C, Davies A, Buchman V, Anderton B, Hanger D. 2004 Parkinson's disease alpha-synuclein mutations exhibit defective axonal transport in cultured neurons. *J. Cell. Sci.* **117**, 1017-1024. (doi:10.1242/jcs.00967)
60. Iyer A, Claessens MMAE. 2019 Disruptive membrane interactions of alpha-synuclein aggregates. *Biochimica Et Biophysica Acta-Proteins and Proteomics* **1867**, 468-482. (doi:10.1016/j.bbapap.2018.10.006)
61. Goldberg A. 2003 Protein degradation and protection against misfolded or damaged proteins. *Nature* **426**, 895-899. (doi:10.1038/nature02263)
62. Kim C, Lee S. 2008 Controlling the mass action of alpha-synuclein in Parkinson's disease. *J. Neurochem.* **107**, 303-316. (doi:10.1111/j.1471-4159.2008.05612.x)
63. Kuznetsov IA, Kuznetsov AV. 2017 Simulating tubulin-associated unit transport in an axon: Using bootstrapping for estimating confidence intervals of best fit parameter values obtained from indirect experimental data. *Proceedings of the Royal Society A* **473**, 20170045. (doi:10.1098/rspa.2017.0045)



## Figure captions

Fig. 1. A diagram that defines the coordinate system adopted in the models. The  $x^*$ -coordinate protrudes from the axon hillock ( $x^* = 0$ ) to the axon tip ( $x^* = L^*$ ). Figure is generated with the aid of Servier Medical Art, licensed under a creative commons attribution 3.0 generic license, <http://Smart.servier.com>.

Fig. 2. Kinetic diagrams that depict various kinetic states in two models of  $\alpha$ -syn transport in the axon and transitions between these kinetic states. (a) The model with anterograde and retrograde motor-driven kinetic states (without cargo diffusion and pausing states). (b) A diagram for the full slow axonal transport model. The diagram is based on the model of SCa transport of neurofilaments developed in ref. [23] with modifications to this model suggested in refs. [24,25] to extend this model to cytosolic proteins transported in SCb. The full slow axonal transport model also includes degradation of free  $\alpha$ -syn due to its destruction in proteasomes.

Fig. 3. Anterograde and retrograde axonal transport model without pausing states and diffusion (kinetic diagram for this model is shown in Fig. 2a). (a) Concentration of cargos transported by anterograde motors. (b) Concentration of cargos transported by retrograde motors.

Fig. 4. Anterograde and retrograde axonal transport model without pausing states and diffusion (kinetic diagram for this model is shown in Fig. 2a). Total cargo concentration (the sum of cargo concentrations in anterograde and retrograde motor-driven states).

Fig. 5. Full slow axonal transport model (kinetic diagram for this model is shown in Fig. 2b). (a) Concentration of cargos transported by anterograde motors. (b) Concentration of cargos transported by retrograde motors.  $T_{1/2,free}^* = 5.76 \times 10^{10}$  s.

Fig. 6. Full slow axonal transport model (kinetic diagram for this model is shown in Fig. 2b). Total cargo concentration (the sum of cargo concentrations in motor-driven, pausing, and diffusion-driven states).

$$T_{1/2,free}^* = 5.76 \times 10^{10} \text{ s.}$$

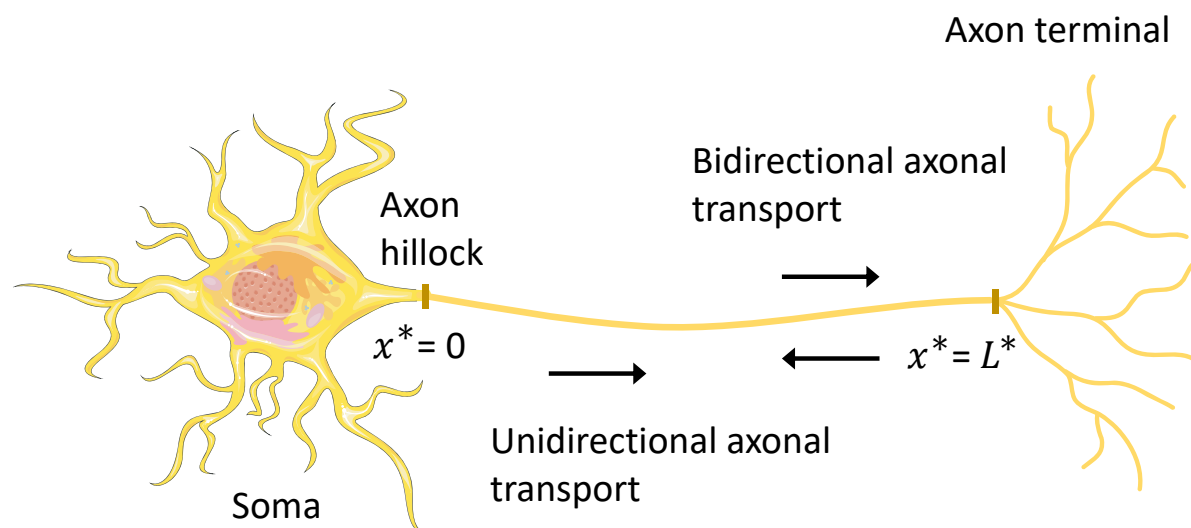

Figure 1

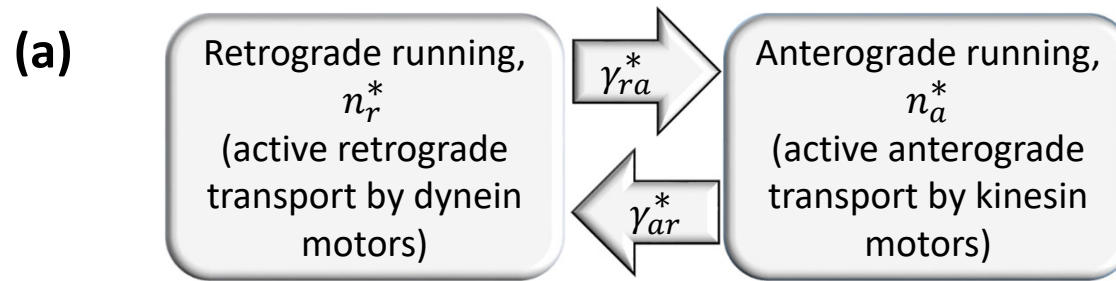

Figure 2a

(b)

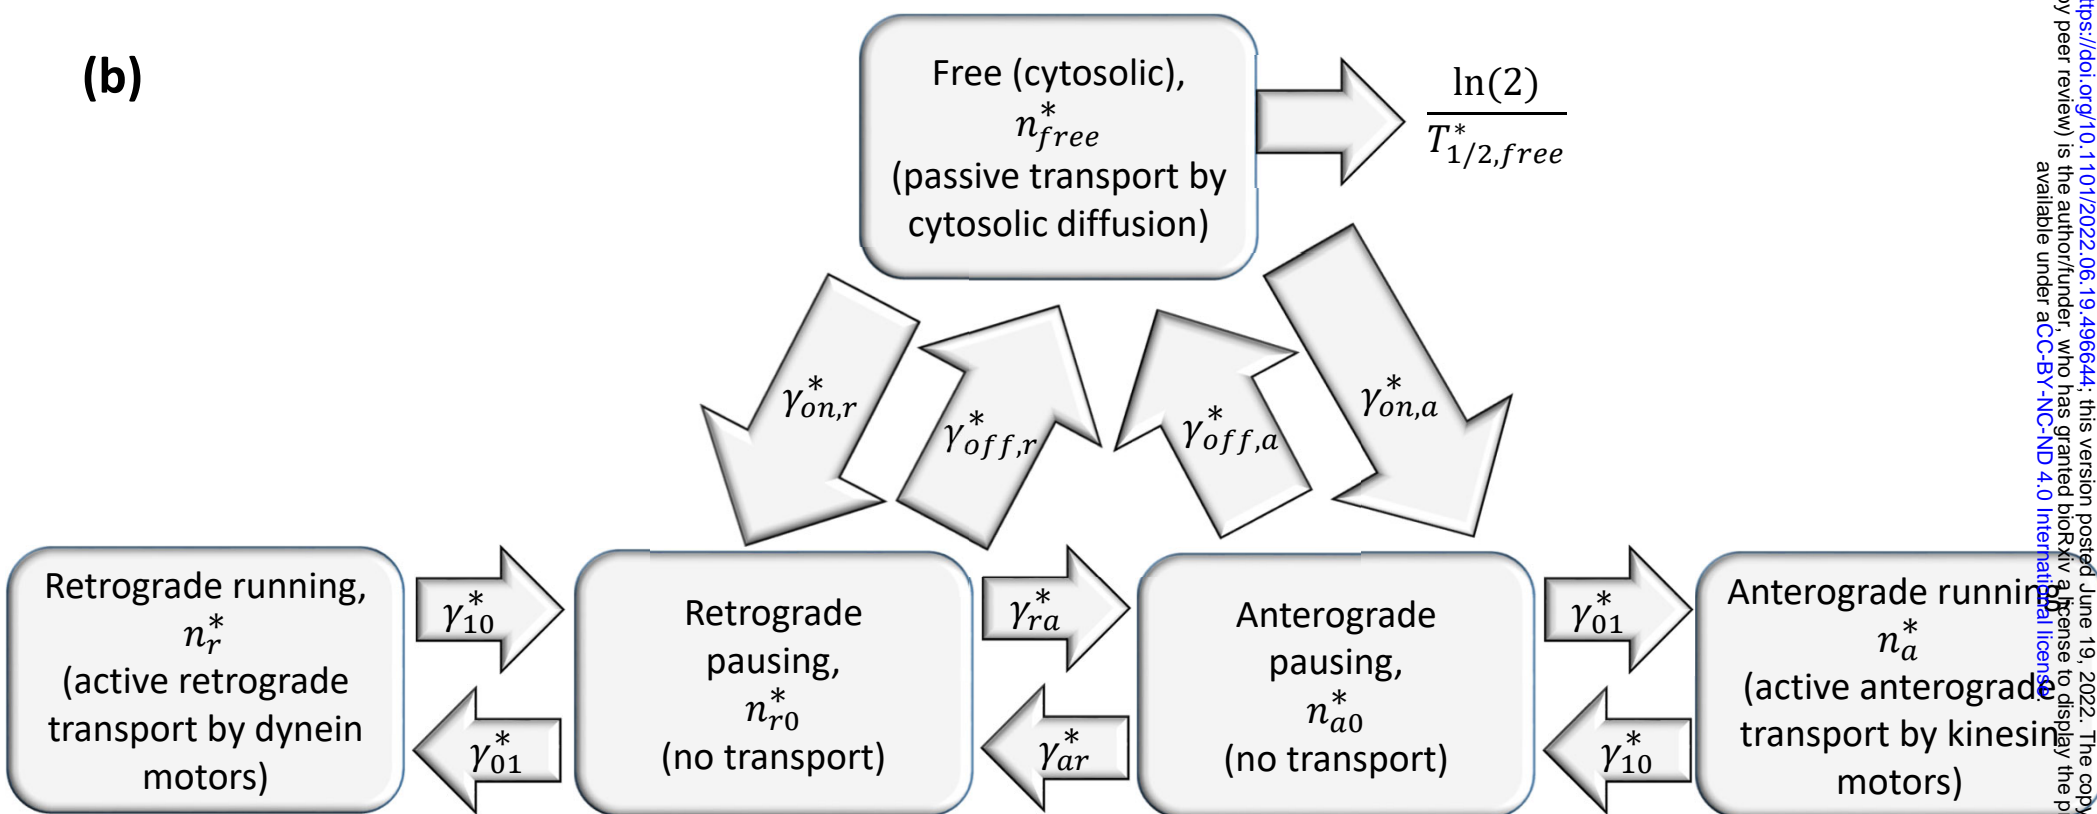

Figure 2b

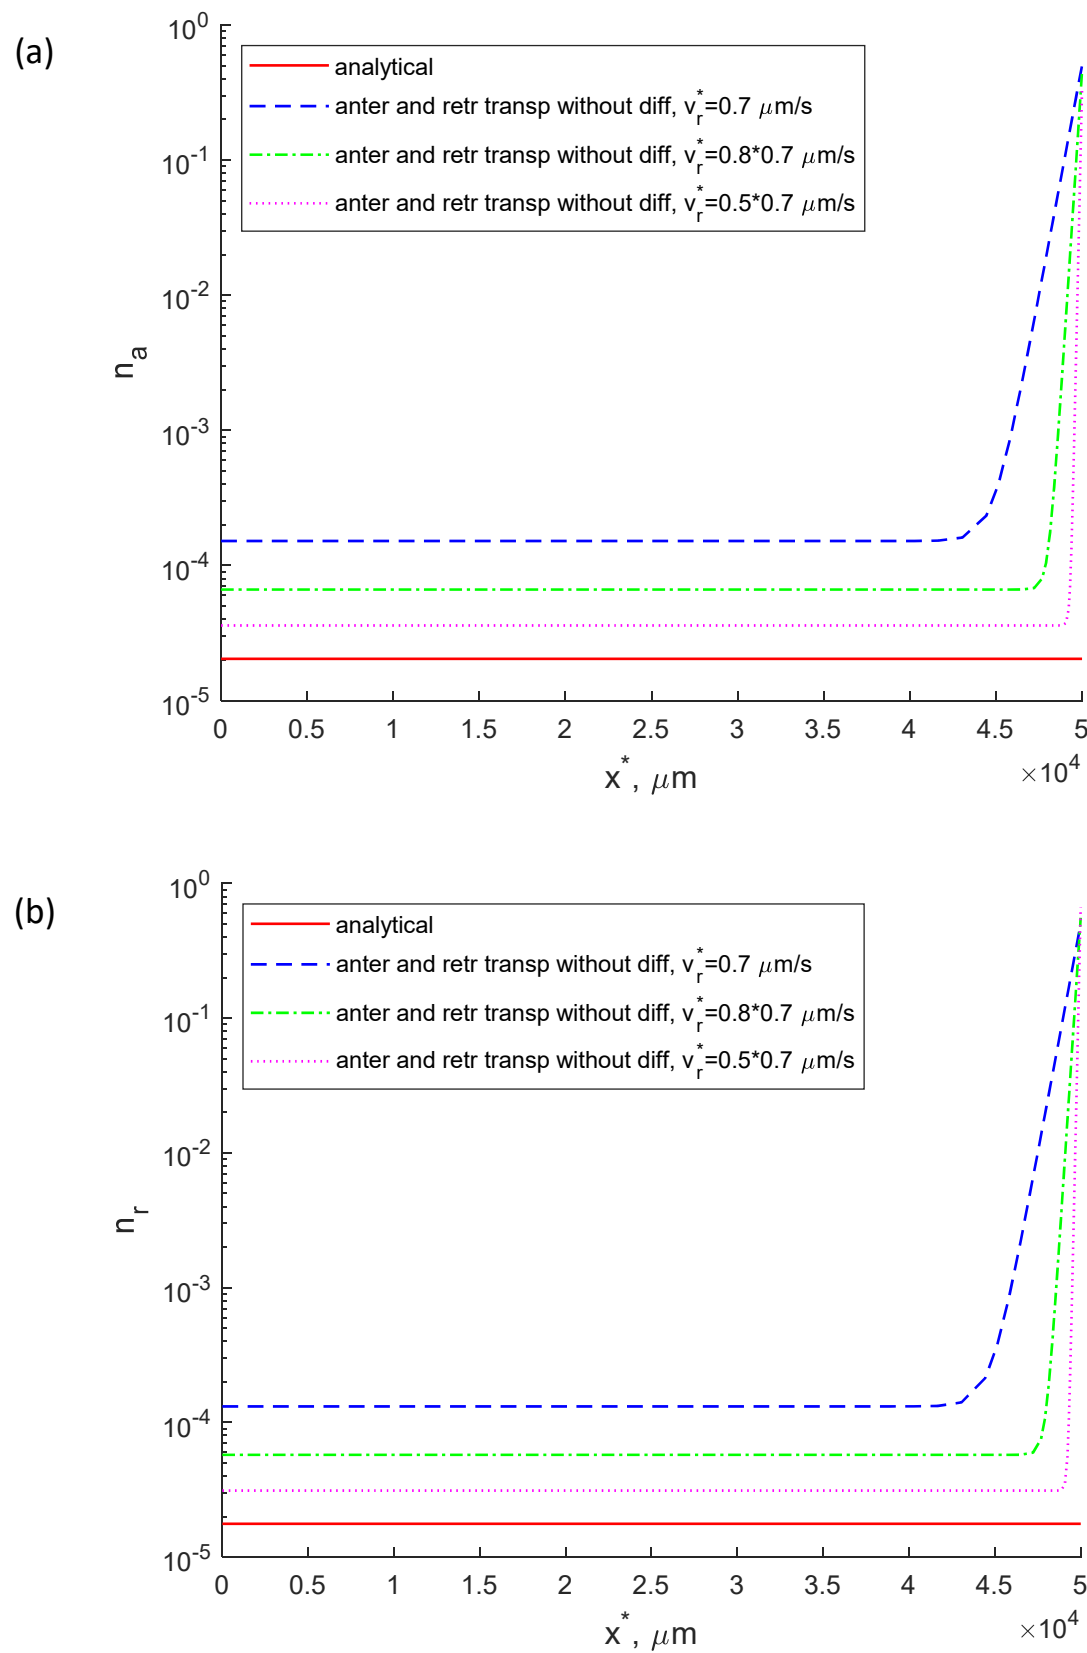

Figure 3

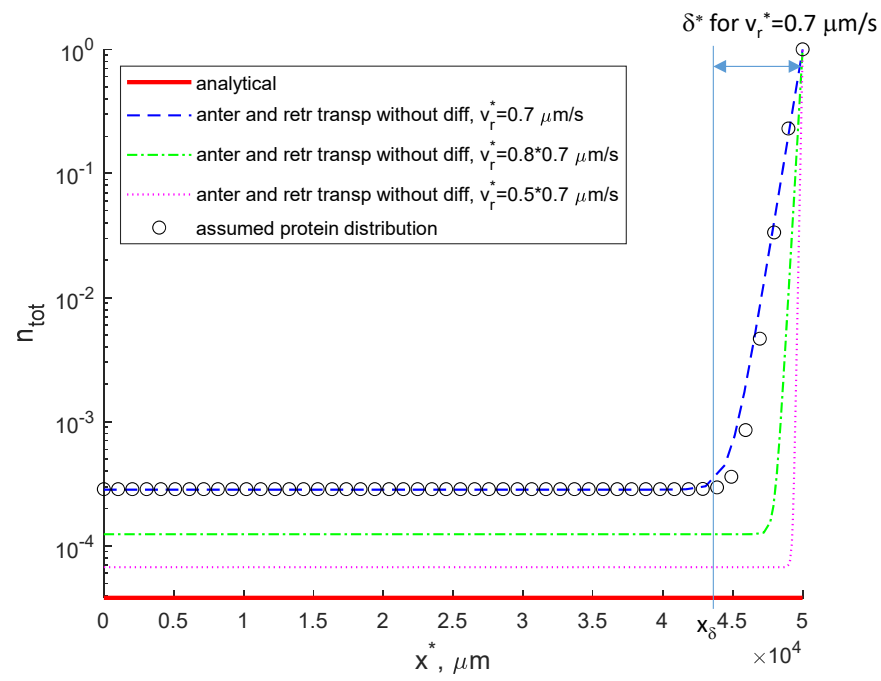

Figure 4

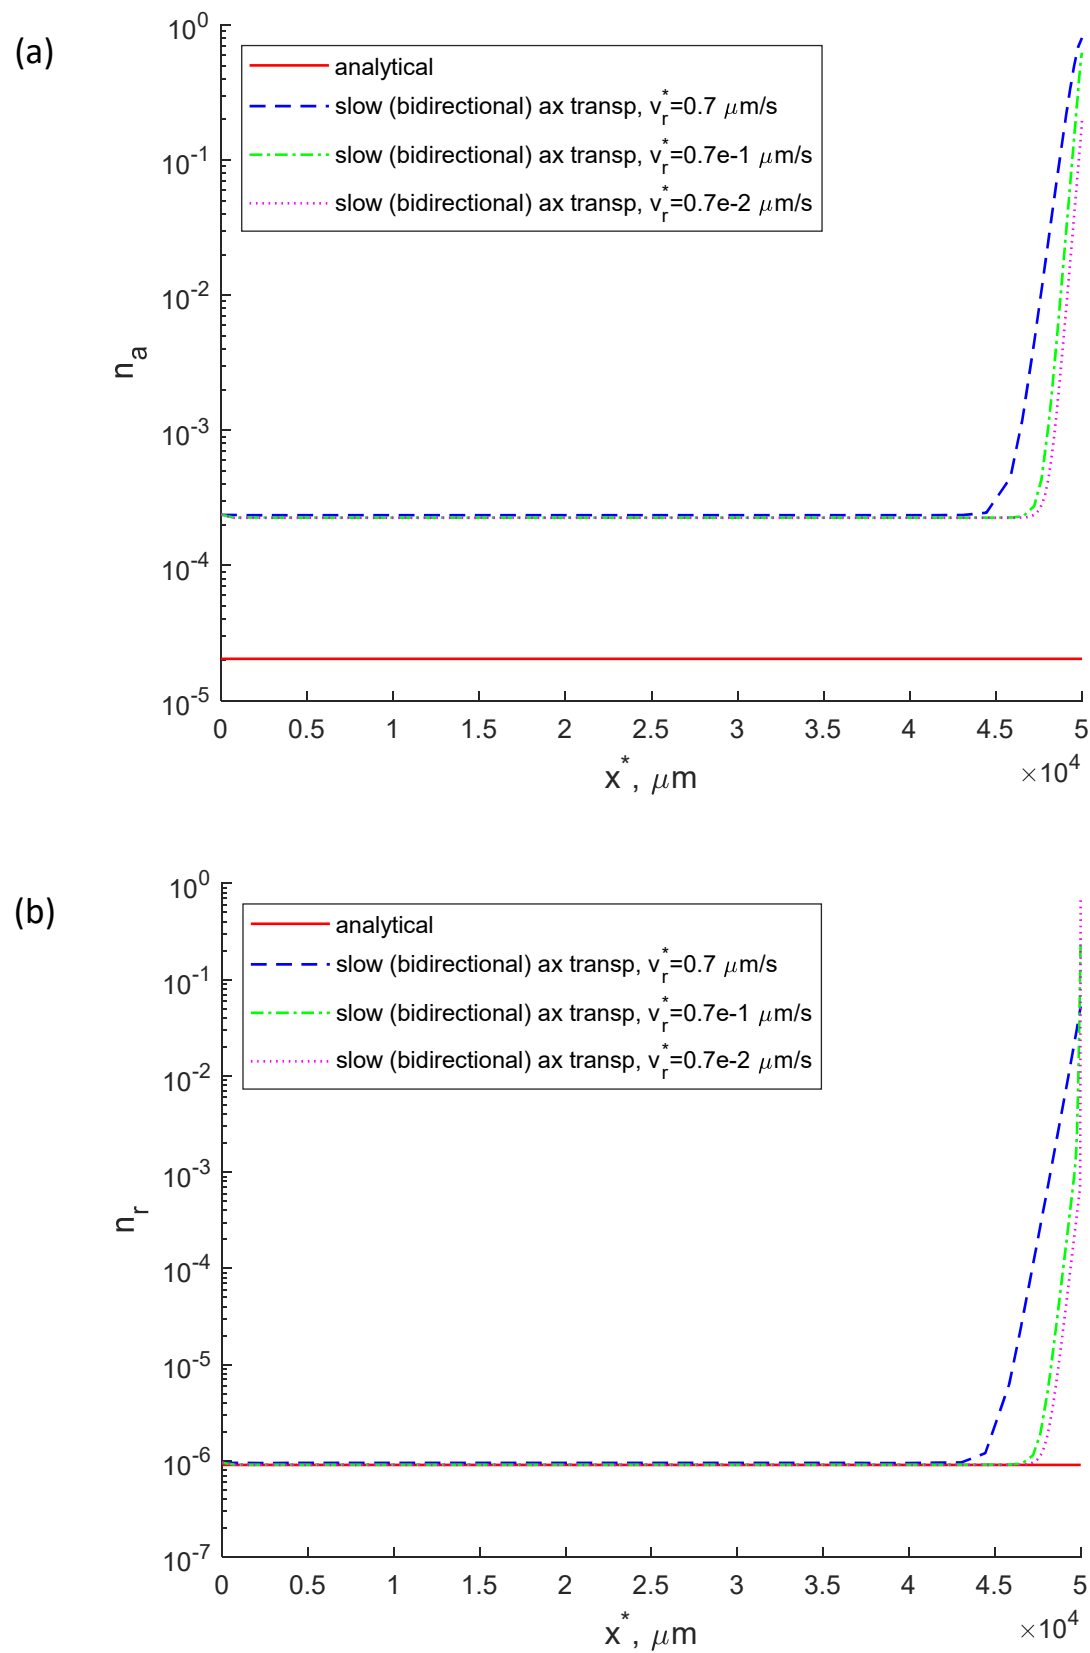

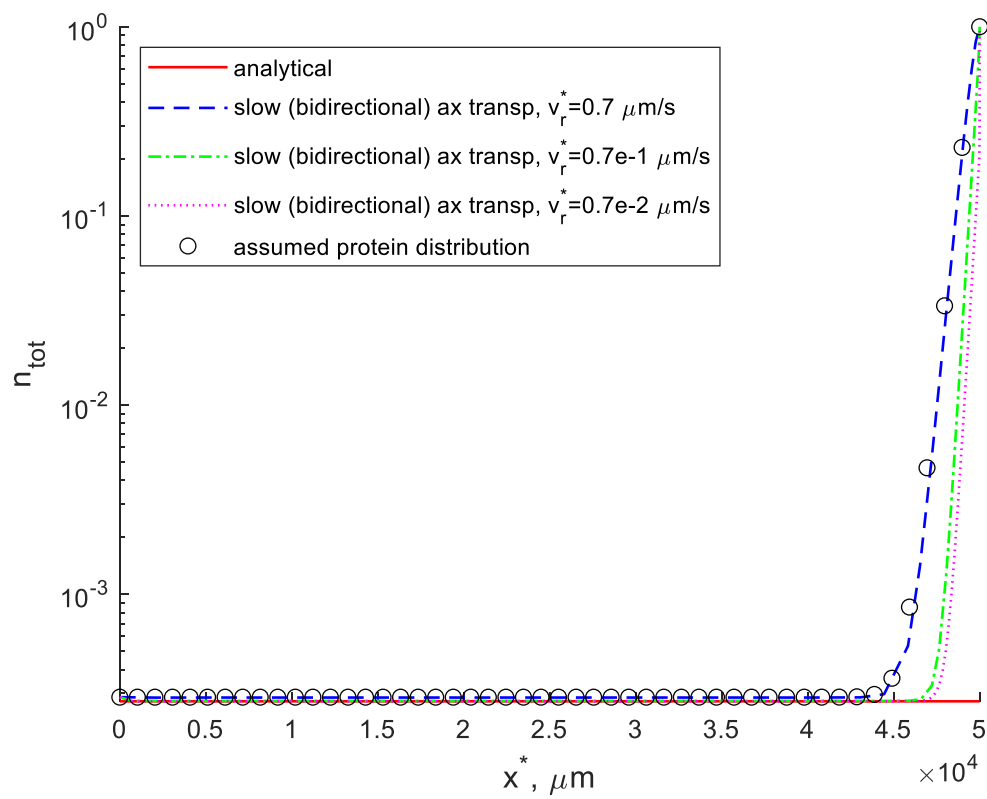

Figure 6



# Dynein dysfunction prevents maintenance of high concentrations of slow axonal transport cargos at the axon terminal

I. A. Kuznetsov<sup>(a), (b)</sup> and A. V. Kuznetsov<sup>(c)</sup>

<sup>(a)</sup>Perelman School of Medicine, University of Pennsylvania, Philadelphia, PA 19104, USA

<sup>(b)</sup>Department of Bioengineering, University of Pennsylvania, Philadelphia, PA 19104, USA

<sup>(c)</sup>Dept. of Mechanical and Aerospace Engineering, North Carolina State University,

Raleigh, NC 27695-7910, USA; e-mail: [avkuznet@ncsu.edu](mailto:avkuznet@ncsu.edu)

## Supplemental Materials

### S1. Supplementary tables

Table S1. Dependent variables in the full slow axonal transport model of  $\alpha$ -syn transport from the soma to the axon tip (Fig. 2b). The model of anterograde-retrograde transport displayed in Fig. 2a contains only two concentrations,  $n_a^*$  and  $n_r^*$ .

| Symbol       | Definition                                                                                                                                       | Units              |
|--------------|--------------------------------------------------------------------------------------------------------------------------------------------------|--------------------|
| $n_a^*$      | Concentration of on-track $\alpha$ -syn moving along MTs anterogradely, propelled by molecular motors                                            | $\mu\text{m}^{-1}$ |
| $n_r^*$      | Concentration of on-track $\alpha$ -syn moving along MTs retrogradely, propelled by molecular motors                                             | $\mu\text{m}^{-1}$ |
| $n_{a0}^*$   | Concentration of pausing on-track $\alpha$ -syn monomers that are still associated with molecular motors and can resume their anterograde motion | $\mu\text{m}^{-1}$ |
| $n_{r0}^*$   | Concentration of pausing on-track $\alpha$ -syn monomers that are still associated with molecular motors and can resume their retrograde motion  | $\mu\text{m}^{-1}$ |
| $n_{free}^*$ | Concentration of free (off-track) $\alpha$ -syn in the cytosol                                                                                   | $\mu\text{m}^{-1}$ |

Table S2. Parameters characterizing transport of  $\alpha$ -syn in the axon obtained from published data or assumed on physical grounds.

| Symbol              | Definition                                                                                                                                                         | Units                      | Value or range                                       | Reference(s)              | Value(s) used in computations                                                              |
|---------------------|--------------------------------------------------------------------------------------------------------------------------------------------------------------------|----------------------------|------------------------------------------------------|---------------------------|--------------------------------------------------------------------------------------------|
| $D_{n_{free}}^*$    | Diffusivity of monomeric $\alpha$ -syn in the free (cytosolic) state                                                                                               | $\mu\text{m}^2/\text{s}$   | 114 <sup>a</sup>                                     | [51]                      | 0, 114                                                                                     |
| $k^*$               | The logistic growth rate, which characterizes the steepness of the $S$ -shaped curve used in approximating the distribution of $\alpha$ -syn along the axon length | $1/\mu\text{m}$            |                                                      |                           | $10^{-3}$                                                                                  |
| $L^*$               | Length of the axon                                                                                                                                                 | $\mu\text{m}$              | up to $10^6$ in humans                               | [35]                      | $5 \times 10^4$ <sup>b</sup>                                                               |
| $n_{tot,x=0}^*$     | Concentration of $\alpha$ -syn at the axon hillock                                                                                                                 | $\mu\text{M}$              | $10^{-3}$ <sup>c</sup>                               | [52]                      | $10^{-3}$                                                                                  |
| $n_{tot,x=L}^*$     | Concentration of $\alpha$ -syn at the presynaptic terminal                                                                                                         | $\mu\text{M}$              | 3.5 <sup>c</sup>                                     | [53]                      | 3.5                                                                                        |
| $N_{fit}$           | Number of points uniformly distributed along the axon length in which we matched the $\alpha$ -syn concentration with the assumed $S$ -shaped distribution         |                            |                                                      |                           | 50                                                                                         |
| $T_{1/2,free}^*$    | Half-life of free $\alpha$ -syn                                                                                                                                    | s                          | $6.62 \times 10^3$ - $1.73 \times 10^5$ <sup>d</sup> | [54-57]                   | $5.76 \times 10^4$ , $5.76 \times 10^{10}$                                                 |
| $v_a^*$             | Velocity of rapid motions of $\alpha$ -syn on MTs propelled by kinesin motors in slow axonal transport                                                             | $\mu\text{m s}^{-1}$       | 0.7                                                  | [58]                      | 0.7                                                                                        |
| $v_r^*$             | Velocity of rapid motions of $\alpha$ -syn on MTs propelled by dynein motors in slow axonal transport                                                              | $\mu\text{m s}^{-1}$       | 0.7                                                  | [58]                      | 0, $0.7 \times 10^{-2}$ , $0.7 \times 10^{-1}$ , $0.5 \times 0.7$ , $0.8 \times 0.7$ , 0.7 |
| $v_{av,estimate}^*$ | Estimated average velocity of $\alpha$ -syn in slow axonal transport (assumed to be constant)                                                                      | $\mu\text{m s}^{-1}$       | 0.023-0.093 <sup>e</sup>                             | [12,28,59]                | 0.05                                                                                       |
| $\omega_1$          | Weighting factor in Eq. (70)                                                                                                                                       | $\text{s}^2/\mu\text{m}^2$ |                                                      | Numerical experimentation | 1                                                                                          |

|            |                              |  |  |                           |        |
|------------|------------------------------|--|--|---------------------------|--------|
| $\omega_2$ | Weighting factor in Eq. (70) |  |  | Numerical experimentation | $10^8$ |
|------------|------------------------------|--|--|---------------------------|--------|

<sup>a</sup> Monomeric  $\alpha$ -syn has large diffusivity, which is explained by its small molecular weight of  $\sim 14$  kDa [60].

<sup>b</sup> We used a representative axon length of 50 mm [35].

<sup>c</sup> According to [52], the  $\alpha$ -syn concentration in presynaptic terminals is estimated to be in the micromolar range. In other parts of the cell the  $\alpha$ -syn concentration can be as low as in the nanomolar range [52]. According to [53], the concentration of  $\alpha$ -syn in the presynaptic terminal is estimated to be  $3.5 \mu\text{M}$ .

<sup>d</sup> Cytosolic proteins are usually degraded in proteasomes. Their typical half-life is days or weeks at the most [61].

It is likely that monomeric  $\alpha$ -syn is degraded in proteasomes [54,62]. Estimates reported in the literature include 1.84 hours [54], 16 hours [55], and 48 hours [56]. We followed [55,57], and used 16 hours ( $5.76 \times 10^4$  s) as an estimate of the half-life of an unprotected  $\alpha$ -syn.

In long neurons, the time that it takes for a protein to travel from the soma to the synapse may exceed the lifetime of the monomeric protein. Therefore, it is likely that proteins are somehow protected from degradation during their transit in the axon [28,29]. As a result, the half-life of  $\alpha$ -syn undergoing slow axonal transport may be much larger than 16 hours. This could be explained by transport in large multiprotein complexes [10] which are too large to enter a proteasome for degradation. For that reason, in computations we used two estimates for  $\alpha$ -syn half-life:  $5.76 \times 10^4$  s (16 hours) and  $5.76 \times 10^{10}$  s ( $1.6 \times 10^7$  hours).

<sup>e</sup> Several different estimates of the average velocity of  $\alpha$ -syn transport in axons have been reported:  $0.022$ - $0.028 \mu\text{m/s}$  ( $1.9$ - $2.4 \text{ mm/day}$ ) [59] and  $0.035$ - $0.12 \mu\text{m/s}$  ( $3$ - $10 \text{ mm/day}$ ) [28]. Since  $\alpha$ -syn is transported in SCb, we used an estimate reported in [12],  $0.023$ - $0.093 \mu\text{m/s}$  ( $2$ - $8 \text{ mm/day}$ ).

Table S3. Kinetic constants characterizing transition of  $\alpha$ -syn between different kinetic states in the slow axonal transport model, which are displayed in Fig. 2b. The anterograde-retrograde model displayed in Fig. 2a includes only two kinetic constants,  $\gamma_{ar}^*$  and  $\gamma_{ra}^*$ . The values of these kinetic constants were

determined by using multi-objective optimization to find values that give the best fit with synthetic data, as described in section 2.4, see also [36,49,63].

| Symbol             | Definition                                                                                                                            | Units    | Initial guess used in the optimization procedure |
|--------------------|---------------------------------------------------------------------------------------------------------------------------------------|----------|--------------------------------------------------|
| $\gamma_{10}^*$    | Kinetic constant describing the rate of transitions $n_a^* \rightarrow n_{a0}^*$ and $n_r^* \rightarrow n_{r0}^*$ (Fig. 2b)           | $s^{-1}$ | $7.19 \times 10^{-3}$                            |
| $\gamma_{01}^*$    | Kinetic constant describing the rate of transitions $n_{a0}^* \rightarrow n_a^*$ and $n_{r0}^* \rightarrow n_r^*$ (Fig. 2b)           | $s^{-1}$ | $4.01 \times 10^{-3}$                            |
| $\gamma_{ar}^*$    | Kinetic constant describing the rate of transitions $n_{a0}^* \rightarrow n_{r0}^*$ (Fig. 2b) and $n_a^* \rightarrow n_r^*$ (Fig. 2a) | $s^{-1}$ | $4.59 \times 10^{-3}$                            |
| $\gamma_{ra}^*$    | Kinetic constant describing the rate of transitions $n_{r0}^* \rightarrow n_{a0}^*$ (Fig. 2b) and $n_r^* \rightarrow n_a^*$ (Fig. 2a) | $s^{-1}$ | $6.76 \times 10^{-3}$                            |
| $\gamma_{on,a}^*$  | Kinetic constant describing the rate of transitions $n_{free}^* \rightarrow n_{a0}^*$ (Fig. 2b)                                       | $s^{-1}$ | $9.43 \times 10^{-2}$                            |
| $\gamma_{on,r}^*$  | Kinetic constant describing the rate of transitions $n_{free}^* \rightarrow n_{r0}^*$ (Fig. 2b)                                       | $s^{-1}$ | $5.90 \times 10^{-2}$                            |
| $\gamma_{off,a}^*$ | Kinetic constant describing the rate of transitions $n_{a0}^* \rightarrow n_{free}^*$ (Fig. 2b)                                       | $s^{-1}$ | $5.29 \times 10^{-3}$                            |
| $\gamma_{off,r}^*$ | Kinetic constant describing the rate of transitions $n_{r0}^* \rightarrow n_{free}^*$ (Fig. 2b)                                       | $s^{-1}$ | $5.40 \times 10^{-3}$                            |

Table S4. Kinetic constants characterizing the transition of  $\alpha$ -syn between different kinetic states in an axonal transport model that includes anterograde and retrograde motor-driven kinetics states only (Fig. 2a).  $v_{av,estimate}^* = 0.05 \mu\text{m s}^{-1}$ . 1000 random points plus the initial point given in Table S3 ( $\gamma_{ar}^*$  and  $\gamma_{ra}^*$  values only) were utilized as starting points in the search for the global minimum of the penalty function given by Eq. (70). All kinetic constants in Table S4 have dimensions  $\text{s}^{-1}$ .

|                       |                       |
|-----------------------|-----------------------|
| $\gamma_{ar}^*$       | $\gamma_{ra}^*$       |
| $7.07 \times 10^{-3}$ | $8.17 \times 10^{-3}$ |

Table S5. Kinetic constants characterizing the transition of  $\alpha$ -syn between different kinetic states in the full slow axonal transport model (Fig. 2b).  $T_{1/2,free}^* = 5.76 \times 10^{10} \text{ s}$ ,  $v_{av,estimate}^* = 0.05 \mu\text{m s}^{-1}$ , and  $D_{n_{free}}^* = 114 \mu\text{m}^2/\text{s}$ . 1000 random points plus the initial point given in Table S3 were utilized as starting points in the search for the global minimum of the penalty function given by Eq. (70). All kinetic constants in Table S5 have dimensions  $\text{s}^{-1}$ .

|                       |                       |                       |                       |                       |                       |                       |                       |
|-----------------------|-----------------------|-----------------------|-----------------------|-----------------------|-----------------------|-----------------------|-----------------------|
| $\gamma_{10}^*$       | $\gamma_{01}^*$       | $\gamma_{ar}^*$       | $\gamma_{ra}^*$       | $\gamma_{on,a}^*$     | $\gamma_{on,r}^*$     | $\gamma_{off,a}^*$    | $\gamma_{off,r}^*$    |
| $1.82 \times 10^{-3}$ | $1.65 \times 10^{-4}$ | $1.44 \times 10^{-4}$ | $5.87 \times 10^{-3}$ | $1.41 \times 10^{-1}$ | $2.49 \times 10^{-2}$ | $9.67 \times 10^{-3}$ | $3.53 \times 10^{-2}$ |

## S2. Supplementary figures

### S2.1. Supplementary figures for the simplified anterograde-retrograde axonal transport model

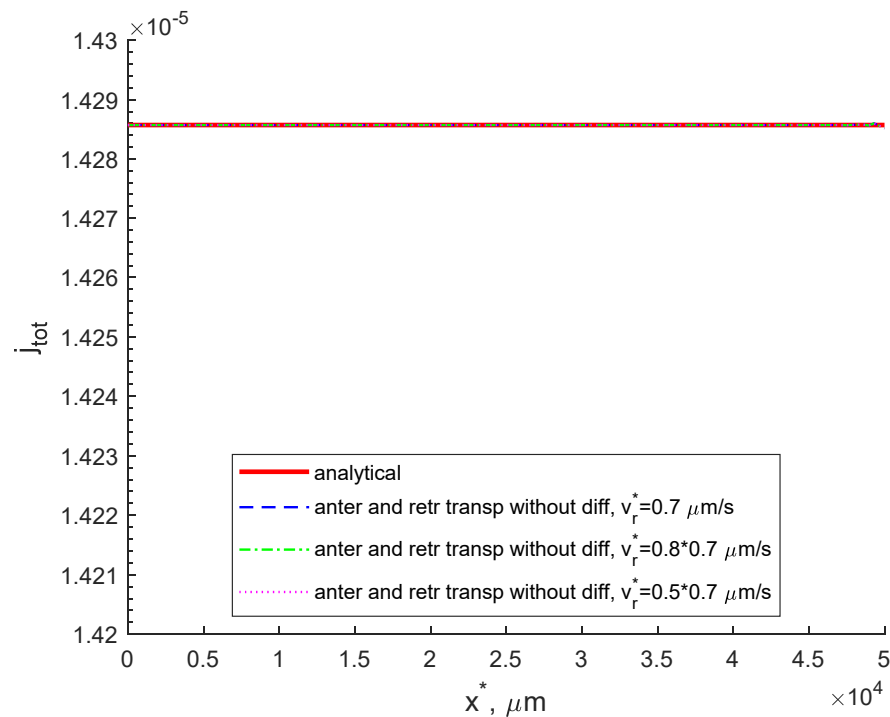

Fig. S1. Anterograde and retrograde axonal transport model without pausing states and diffusion. Total flux of cargos due to the action of anterograde and retrograde motors. Note that the model does not include destruction of cargos in proteasomes, which explains the uniform flux of cargos.

## S2.2. Supplementary figures for the full slow axonal transport model

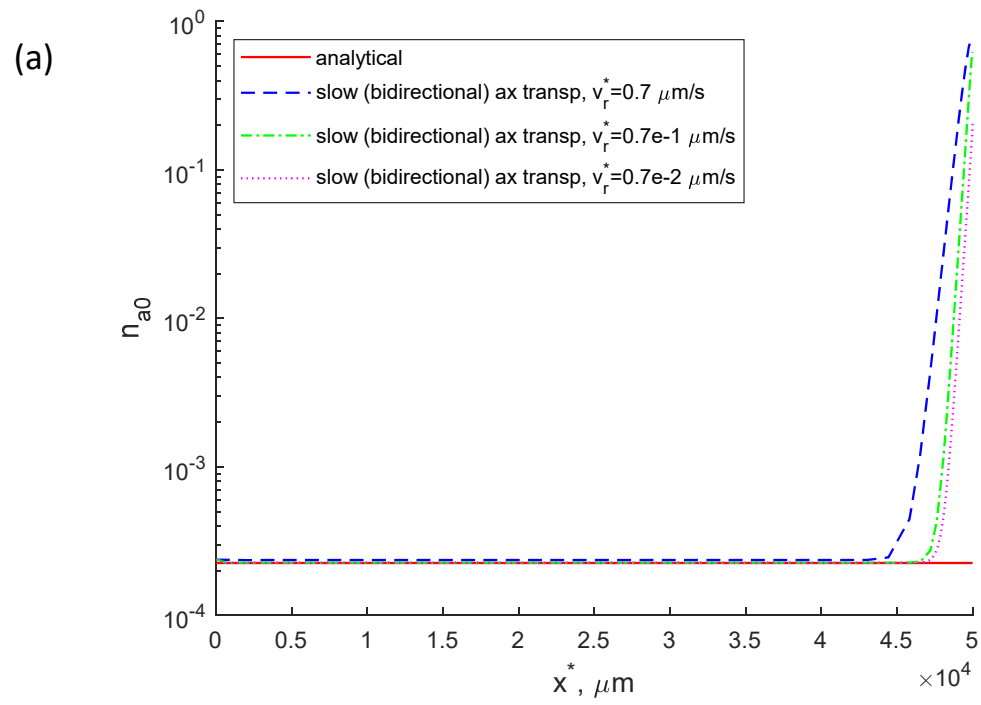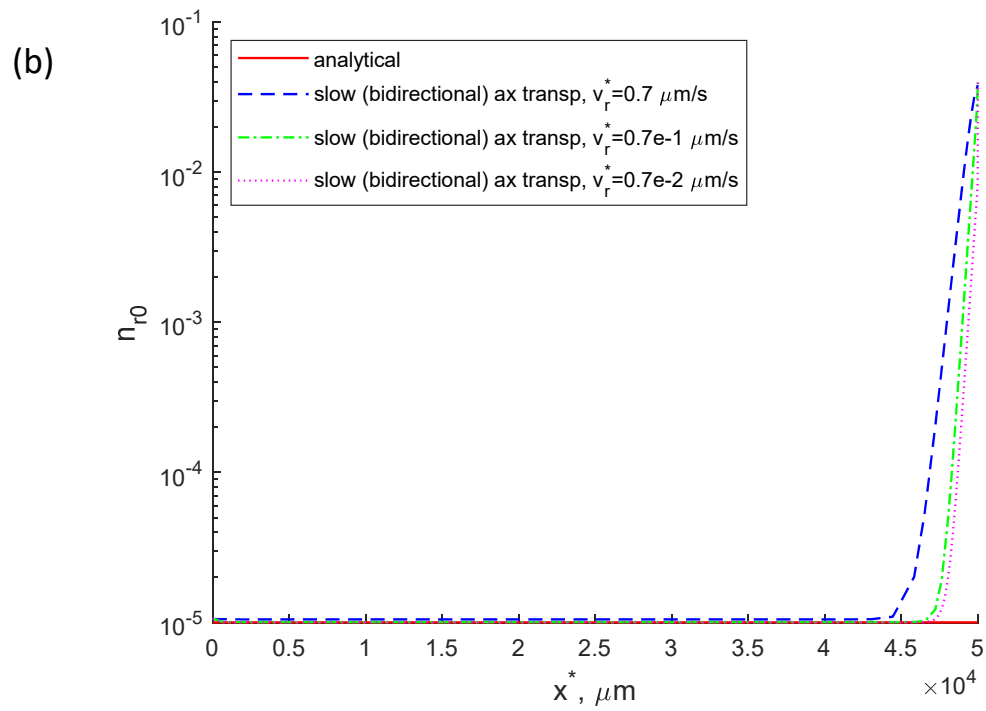

Fig. S2. Full slow axonal transport model (kinetic diagram for this model is shown in Fig. 2b). (a) Concentration of cargos in the anterograde pausing state. (b) Concentration of cargos in the retrograde pausing state.

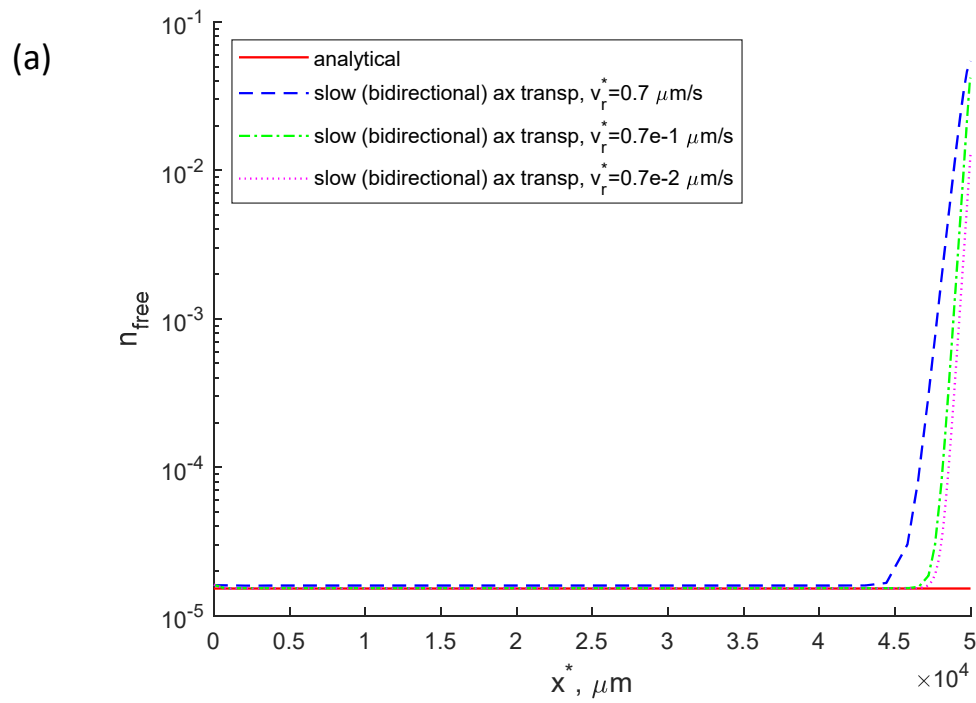



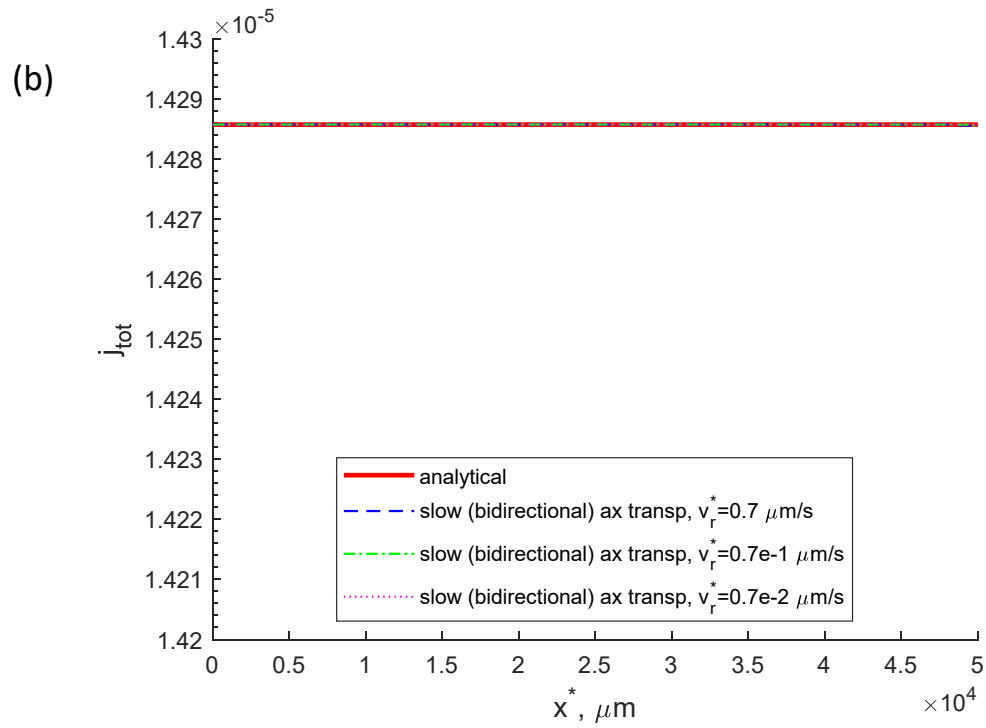

Fig. S3. Full slow axonal transport model (kinetic diagram for this model is shown in Fig. 2b). (a) Concentration of cargos in the free (cytosolic) state. (b) Total flux of cargos due to the action of molecular motors and diffusion.  $T_{1/2, \text{free}}^* = 5.76 \times 10^{10} \text{ s}$ .

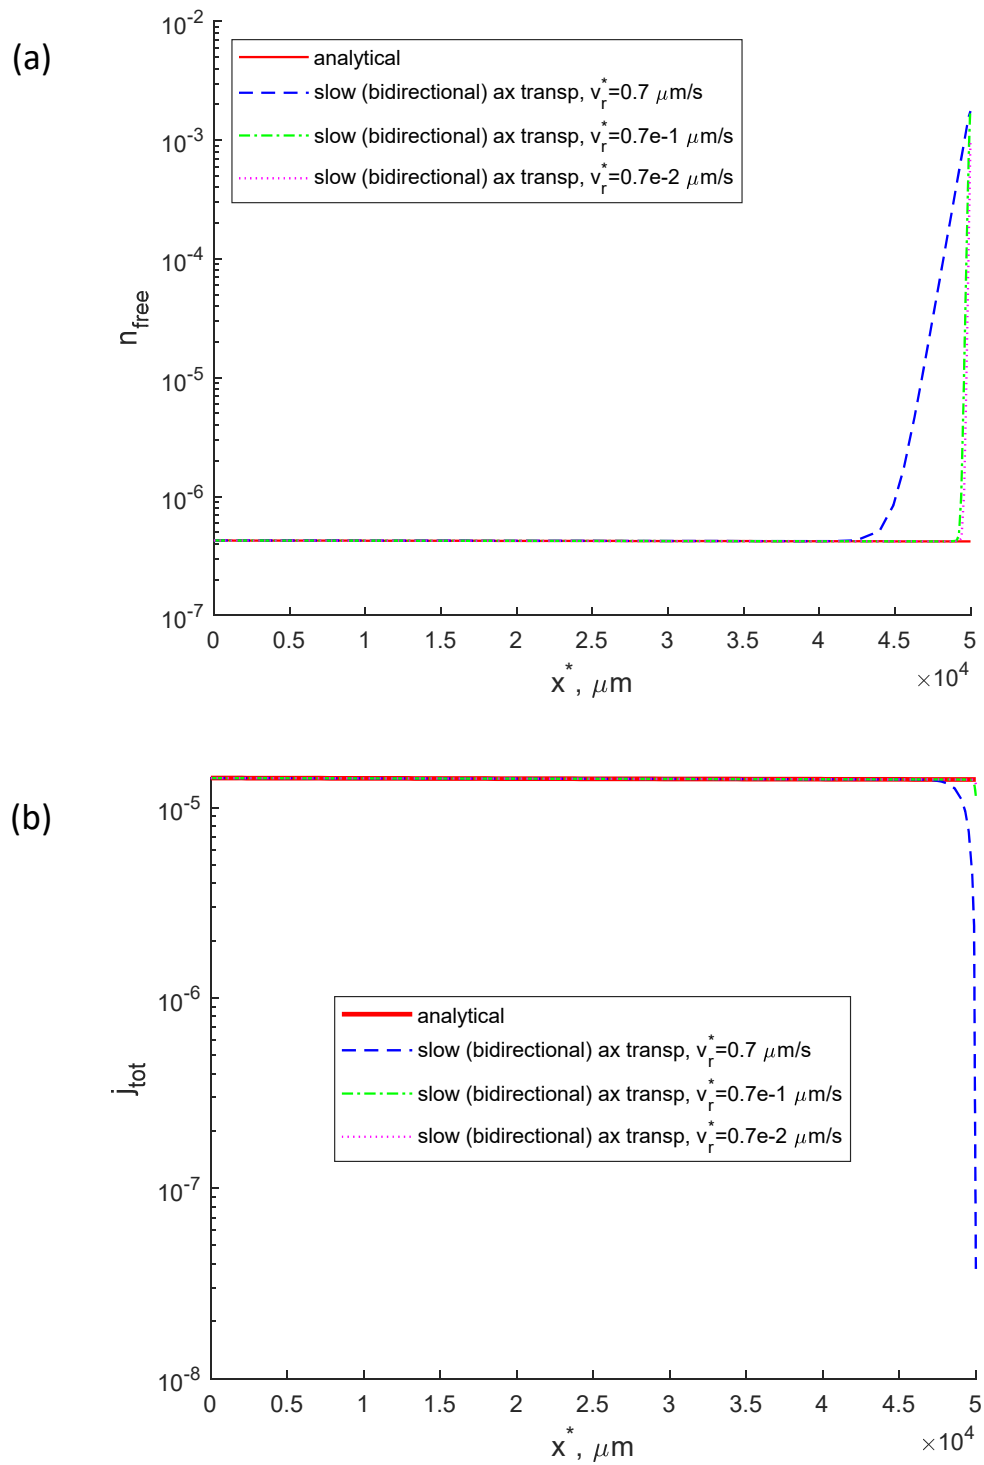

Fig. S4. Full slow axonal transport model (kinetic diagram for this model is shown in Fig. 2b). (a) Concentration of cargos in the free (cytosolic) state. (b) Total flux of cargos due to the action of molecular motors and diffusion.  $T_{1/2,free}^* = 5.76 \times 10^4$  s.
